# Supplementary material
Source: PubMed Central journal article supplement (PMC4972282)
Supplement: supp_pp.16.00572_PP2016-00572R1_Supplemental_Material.pdf [file supp_pp.16.00572_PP2016-00572R1_Supplemental_Material.pdf]

## SUPPLEMENTAL INFORMATION

### *Chlamydomonas reinhardtii* PsbS is functional and accumulates rapidly and transiently under high light.

Tania Tibiletti, Pascaline Auroy, Gilles Peltier, Stefano Caffarri

**Supplemental Figure S1. Kinetics of PsbS accumulation in *Chlamydomonas* WT(4A+) and *npq4* cells during a high light treatment at three different light intensities** Cells grown in minimal medium were exposed to 400 (A), 800 (B) and 1200 (C)  $\mu\text{mol photons m}^{-2} \text{s}^{-1}$  for 32 hr and aliquots were harvested at different times as indicated. 2  $\mu\text{g}$  (in Chls) of total membranes were analysed by SDS-PAGE and by immunoblot assays using antiPsbS and antiLhcSR3 antibodies. PsbS showed a transient accumulation at all light intensities, while LhcSR3 showed a slightly delayed induction and a strong accumulation till the end of the treatment. The PsbS amount seems somehow proportional to the light intensities (see the unspecific cross-reactions, which are rather constant in all our experiments). The Coomassie stained gels are shown as protein loading control.

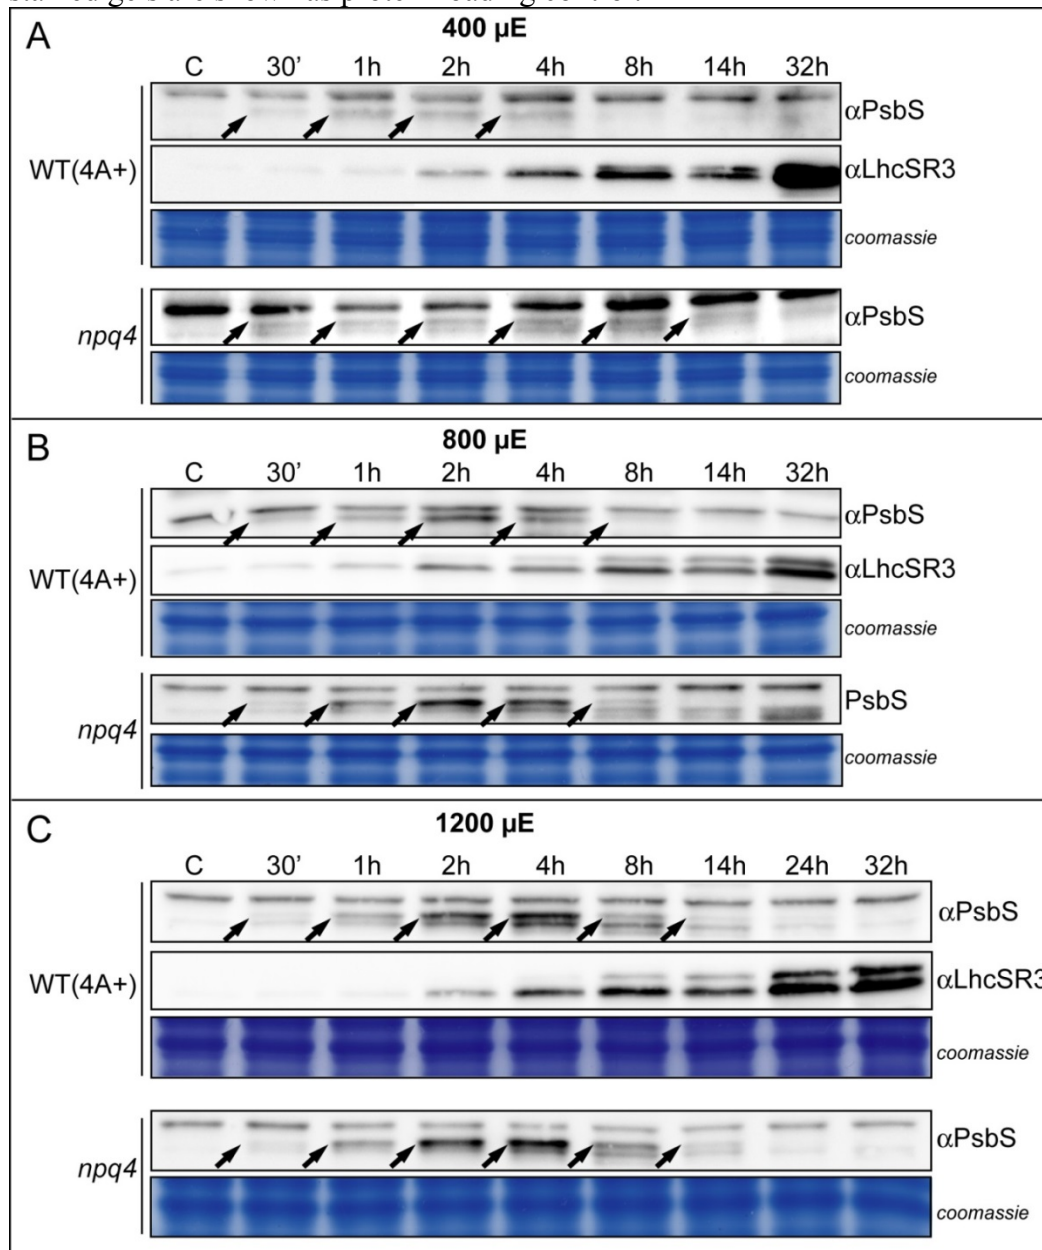

**Supplemental Figure S2. Test of the antibody against PsbS.** A) Thylakoids membranes from Arabidopsis WT and *npq4* mutant plants (lacking PsbS) were analysed by immunoblot analysis together with the recombinant *Chlamydomonas* PsbS protein. The *npq4* sample lacks a cross-reactive band, indicating that plant PsbS is correctly detected, as well the recombinant *Chlamydomonas* PsbS. B) The antibody against PsbS showed various cross-reactions on proteins extracted from *Chlamydomonas* cells, but one specific band appears in high light treated cell at the MW of PsbS (around 20-25 kDa). This high light-band, as well as the band specific to PsbS in Arabidopsis, disappeared (and it was the only one disappearing) when the PsbS antibody was preincubated with an excess of recombinant *Chlamydomonas* PsbS before decorating the membranes, indicating the correct recognition and assignment of the PsbS band. C) Slices of a SDS-PAGE at the PsbS position were cut and analysed by mass spectrometry (see [Supplemental Material MM1](#)). Seven specific PsbS peptides ([Supplemental Material MM1](#)) were detected only in the high light treated sample.

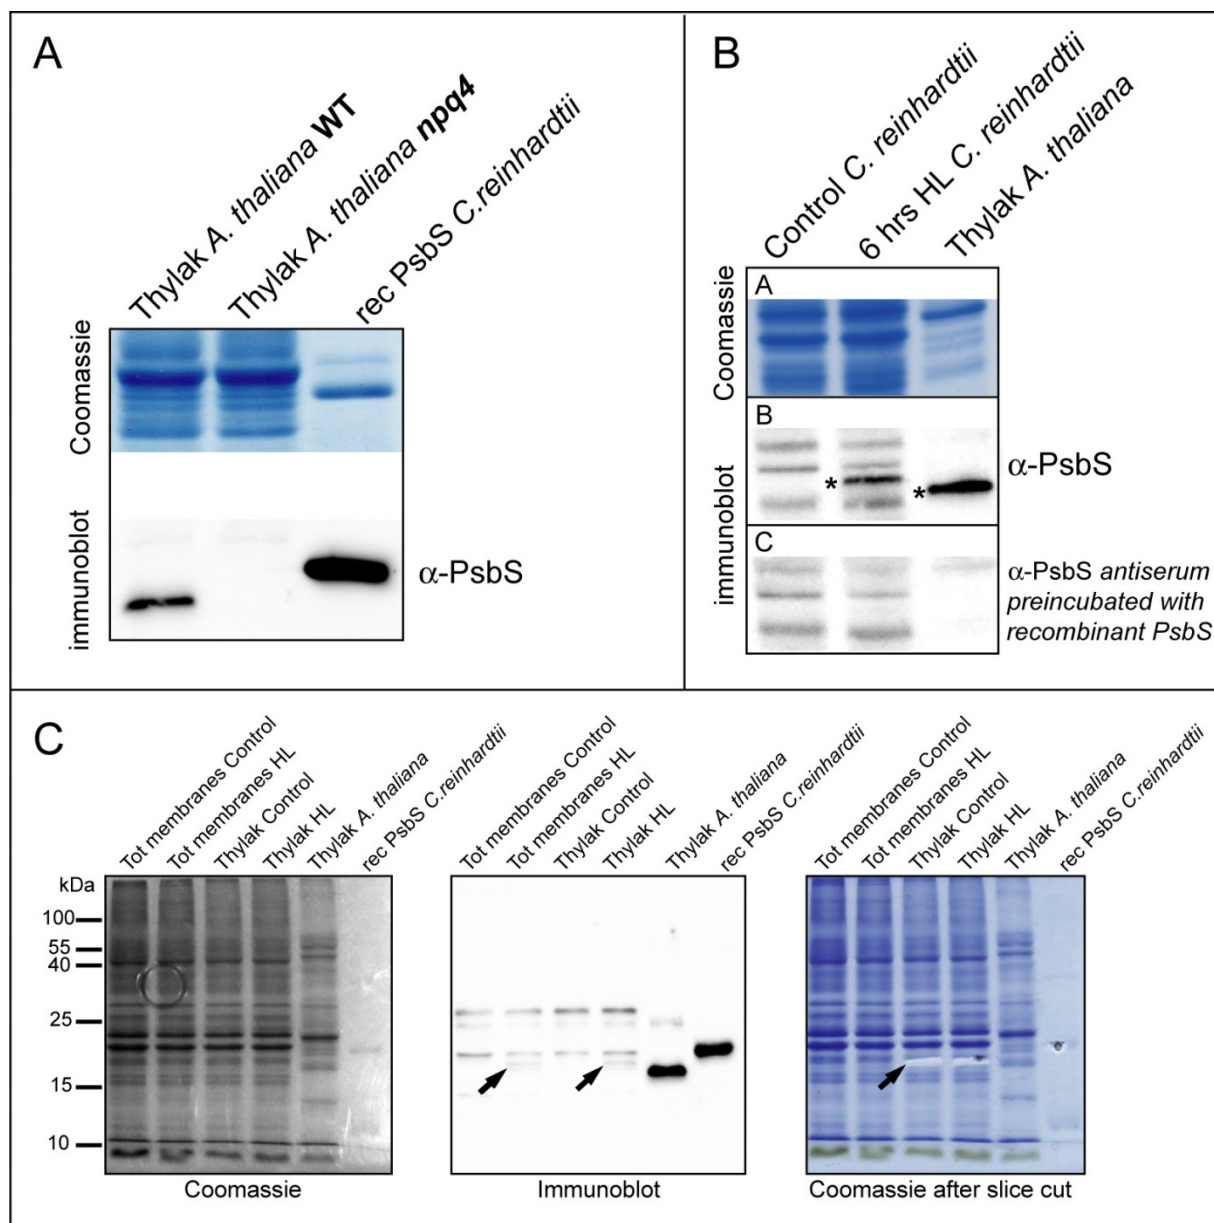

**Supplemental Figure S3. NPQ of individual oePsbS strains and on liquid cultures.** A) The NPQ kinetics of the single independent strains averaged in [Figure 4](#) (3 oePsbS.Cr(wt); 3 oePsbS.At(wt); 4 oePsbS.Cr(npq4); 2 oePsbS.At(npq4)) are shown. Data are the average $\pm$ SD of the averaged values of the 3 spots for each strain per 5 replicate plates. B) NPQ of oePsbS cells (one strain per construction/genotype) and control cells grown in liquid minimal medium and CO<sub>2</sub>-enriched environment have been measured with a PAM fluorimeter. Results were similar to those obtained on solid medium. Note the much important NPQ reversibility at the end of the light phase in oePsbS strains as compared to the controls, a mark for PsbS activation by the low luminal pH. Reversibility in WT(4A+) and *npq4*(4A+) cells is even absent, despite some accumulation of LhcSR1, which was similar in all strains ([Supplemental Figure S4](#)). Data are the average $\pm$ SD of 3 measurements.

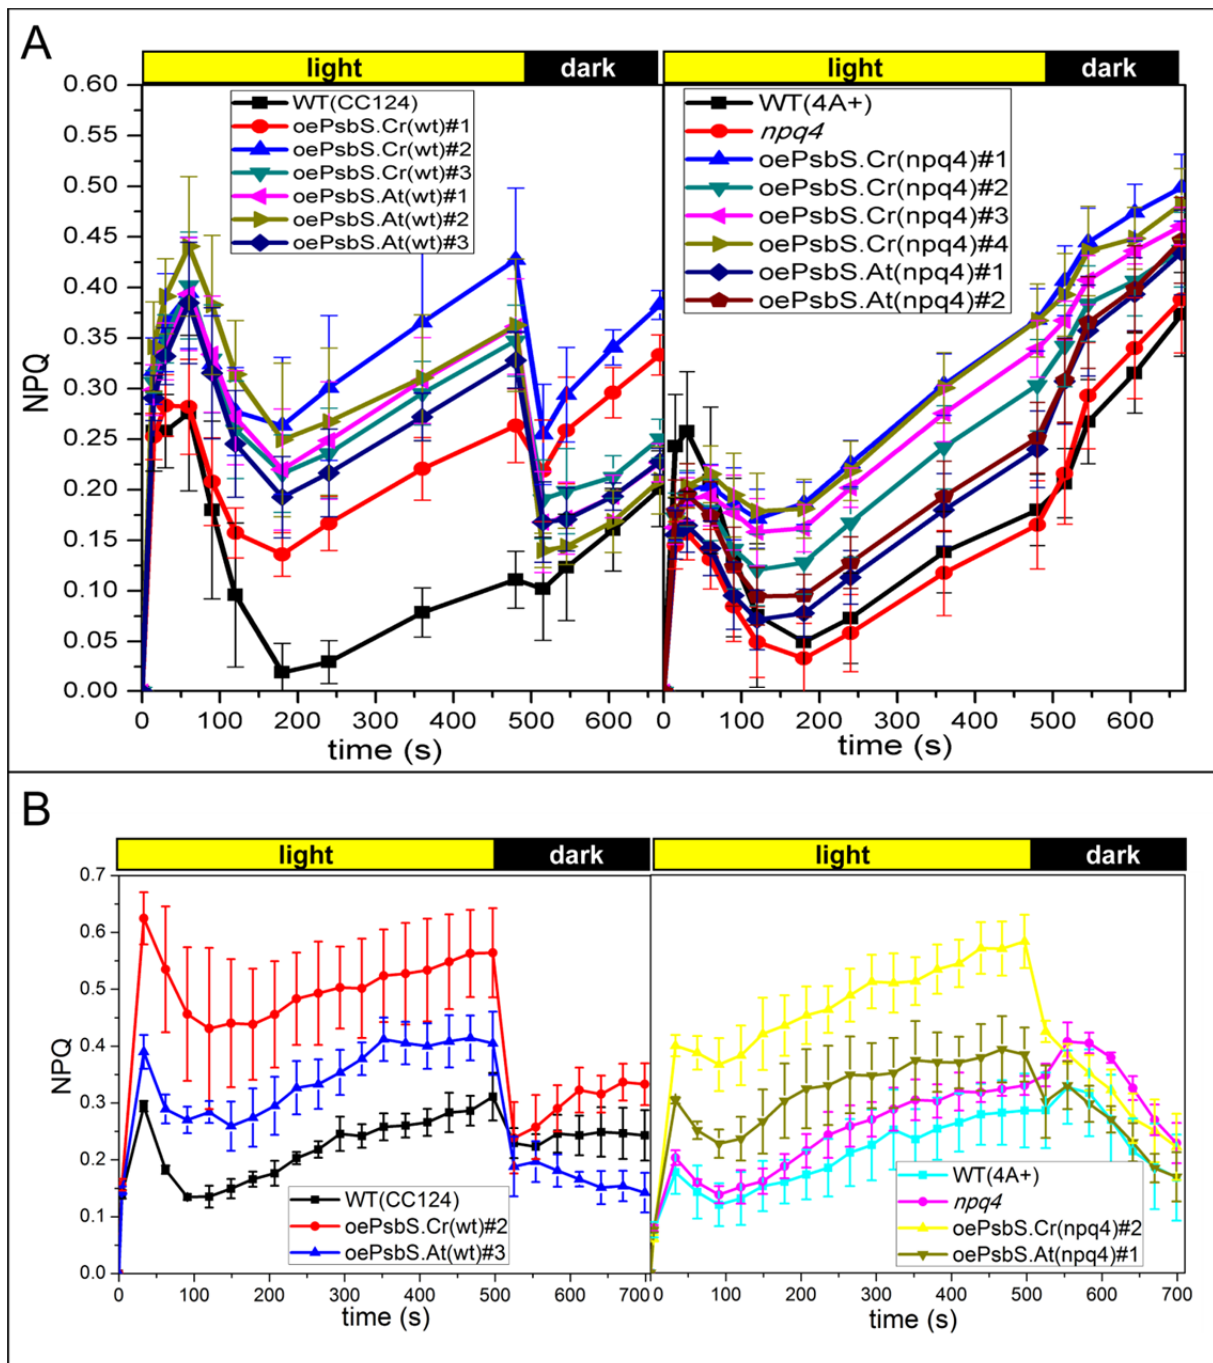

**Supplemental Figure S4. Biochemical characterization of oePsbS and control strains.** A) Chls *a/b* ratio of cells grown on minimal medium was measured by fitting the absorption spectrum of the pigments extracted in acetone 80% (Croce et al., 2002). All strains showed a very similar Chl *a/b* ratio. Values are the average±SD of three measurements per strain. The average of the Chl *a/b* ratio of strains with the same construction is also shown in blue. B) Immunoblots against proteins representatives of different photosynthetic complexes (CP43 and PsbO for PSII, PetA for Cyt b6f and PsaC for PSI), for proteins involved in cyclic electron transport (PGRL1 and NDA2) and for LhcSR3 and LhcSR1. No significant differences were detected between oePsbS strains and their control, expect for a lower amount of PGRL1 in oePsbS.At(wt). Immunoblots were performed on thylakoids purified from cells used for PAM measurements shown in Supplemental Figure S3B. Results on thylakoids from WT(CC124) treated under high light are also shown. The Coomassie stained gel is an example of protein loading. Note that the immunoblot against LhcSR1 was previously decorated with αLhcSR3, showing that LhcSR1 migrates in a distinct and lower band with respect to LhcSR3 and phosphorylated LhcSR3 (P-LhcSR3).

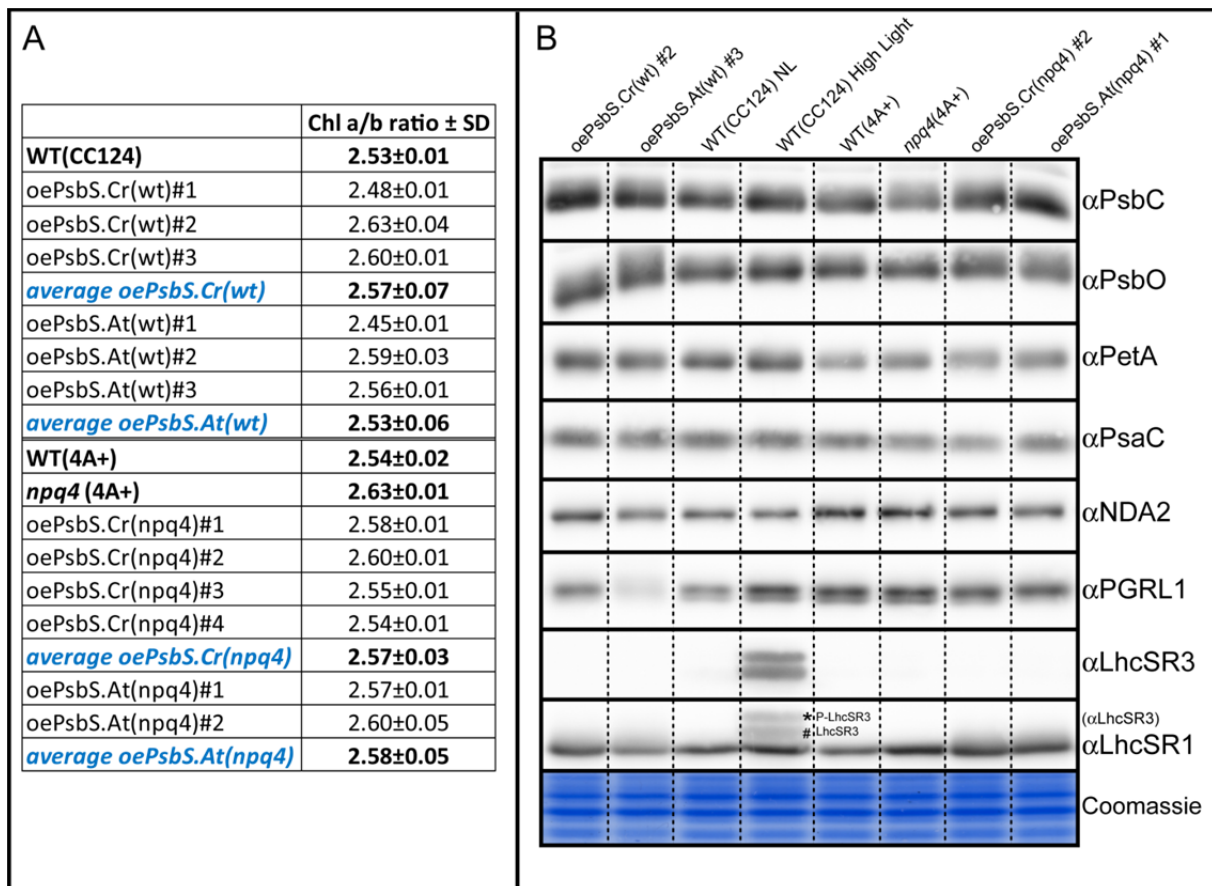

**Reference:** Croce R, Canino g, Ros F, Bassi R (2002) Chromophore organization in the higher-plant photosystem II antenna protein CP26. *Biochemistry* 41: 7334-7343

## Supplemental Materials and Methods MM1.

### *Mass spectrometry analysis.*

Trypsin digestion of gel band containing proteins was manually performed as previously described (Abdelkafi et al., 2009). LC-MS/MS analyses were performed on an ESI-Q-Exactive plus mass spectrometer (ThermoFisher) coupled to a nano liquid chromatography (Ultimate 3000, Dionex). Peptides were loaded onto a nano trap (Acclaim PepMap100, 100µm x 2cm, 5µm, 100Å, Dionex) mounted in a 6-port valve before elution onto a C18 column (Acclaim PepMap RSLC, 75µm x 150 mm, 2µm, 100Å, Dionex). A linear gradient from 4% to 55% of mobile phase B (20% water, 80% acetonitrile/0.1% formic acid) in A (0.1% formic acid in water) for 30 min and then to 95% mobile phase B in 5 min. The peptides were detected into the mass spectrometer in a positive ion mode, alternating a scan event full MS in the Orbitrap analyzer at 70 000 resolution in a 350-1900 m/z range (Auto Gain Control set at  $3 \times 10^6$ ) and scan events of fragmentation of the 10 top ion parents, in the Higher Energy Collisional Dissociation cell (HCD). MS/MS fragments were analyzed in the Orbitrap at 17 500 resolution in a 200-2000 m/z range (Auto Gain Control set at  $1 \times 10^5$ ).

For protein identification, spectra were processed by the Proteome Discoverer software (ThermoFisherScientific, version: 1.4.0.288) using the pipeline tree (0) Spectrum Files, (1) Spectrum Selector, (2) Sequest HT algorithm and (3) Percolator. The following parameters were set at : *Chlamydomonas reinhardtii* extracted from nr NCBI; enzyme: Trypsin; dynamic modification: oxidation / +15.995 Da (Met), static modification: carbamidomethyl / +57.021 Da (Cys); mass values : monoisotopic; precursor mass tolerance:  $\pm 10$  ppm; fragment mass tolerance:  $\pm 0.02$  Da; missed cleavages : 2. Proteins were considered as identified by 2 unique “rank 1” peptides passing the high confidence filter, with validation on q-Value (Strict Target FDR : 0.01) and maximum Delta Cn: 0.05.

The mass spectrometry results are given in [Supplemental Table S2](#). For PsbS identification, the following peptides were detected:

GALAQFDIETGLSLR; FFGVQGFQFTK; TNELFVGR; ENELFVGR;  
QATGLPAPAIN GK; AAQLGFAFSLIGEAVTGK; ITLLEPK

**Reference:** S. Abdelkafi, H. Ogata, N. Barouh, B. Fouquet, R. Lebrun, M. Pina, F. Scherlinckx, P. Villeneuve et F. Carrière. Identification and biochemical characterization of a GDSL-motif carboxylester hydrolase from *Carica papaya* latex. *BBA: Molecular and Cell Biology of Lipids*, 2009;1791(11):1048-5.

**Supplemental Table S1. Primers used for the quantitative Real Time PCR experiments.**

| <b>Target gene</b> | <b>Primer name</b> | <b>Sequence 5'-3'</b>   |
|--------------------|--------------------|-------------------------|
| <i>CBLP</i>        | Cblp fw            | CTTCTCGCCCATGACCAC      |
| <i>CBLP</i>        | Cblp rev           | CCCACCAGGTTGTTCTTCAG    |
| <i>IDA5</i>        | Ida5 fw            | GCCAGGTCTCTGCTCTGGTG    |
| <i>IDA5</i>        | Ida5 rev           | TACTCGGACTTGCGGATCCA    |
| <i>LHCSR3.2</i>    | LhcSR3.2 fw        | TGTGAGGCACTCTGGTGAAG    |
| <i>LHCSR3.2</i>    | LhcSR3.2 rev       | CGCCTGTTGTCACCATCTTA    |
| <i>LHCSR3.1</i>    | LhcSR3.1 fw        | CACAACACCTTGATGCGAGATG  |
| <i>LHCSR3.1</i>    | LhcSR3.1 rev       | CCGTGTCTTGTGTCAGTCCCTG  |
| <i>LHCSR1</i>      | LhcSR1 fw          | GAGTCTGAGATCACCCACGG    |
| <i>LHCSR1</i>      | LhcSR1 rev         | CCGATCTGCTGGAAGTGGTA    |
| <i>PSBS2</i>       | PsbS2 fw           | GGTTACGCACGTTATCACTTGT  |
| <i>PSBS2</i>       | PsbS2 rev          | CTCTCTGCACGCGTTGTACG    |
| <i>PSBS1</i>       | PsbS1 fw           | TAAACCGTGTATTGGA ACTCCG |
| <i>PSBS1</i>       | PsbS1 rev          | CTCTGCACGCGGCGTGTT      |

**Supplemental Table S2. Full gene of proteins identified by mass spectrometry.** The full lists of proteins identified on SDS-PAGE slices shown in [Supplemental Figure S2](#) is given. A) List from control sample. B) List from high light sample. PsbS is highlighted in yellow. For PsbS, 7 different peptides have been detected (see [Supplemental Materials and Methods MM1](#)).

A)

| Accession | Description                                                                                                              | Score  | Coverage | # Unique Peptides | # Peptides | # PSMs | # AAs | MW [kDa] | calc. pI |
|-----------|--------------------------------------------------------------------------------------------------------------------------|--------|----------|-------------------|------------|--------|-------|----------|----------|
| 131389    | RecName: Full=Oxygen-evolving enhancer protein 2, chloroplastic; Short=OEE2; Flags: Precursor                            | 203.75 | 60.82    | 15                | 15         | 78     | 245   | 25.9     | 9.11     |
| 158282427 | light-harvesting protein of photosystem I [Chlamydomonas reinhardtii]                                                    | 139.33 | 69.55    | 10                | 10         | 34     | 243   | 25.9     | 9.00     |
| 158279717 | light-harvesting protein of photosystem I [Chlamydomonas reinhardtii]                                                    | 97.16  | 47.15    | 10                | 10         | 28     | 246   | 26.9     | 8.65     |
| 158273869 | light-harvesting protein of photosystem I [Chlamydomonas reinhardtii]                                                    | 74.71  | 73.93    | 11                | 11         | 19     | 257   | 27.8     | 8.97     |
| 2493039   | RecName: Full=ATP-synthase delta chain, chloroplastic; AltName: Full=F-ATPase delta chain; Flags: Precursor              | 70.00  | 53.42    | 12                | 12         | 20     | 219   | 24.0     | 8.72     |
| 40714511  | light-harvesting chlorophyll-a/b binding protein of photosystem I (Type II) [Chlamydomonas reinhardtii]                  | 58.41  | 44.57    | 6                 | 6          | 13     | 267   | 28.9     | 8.32     |
| 60391855  | RecName: Full=Chlorophyll a-b binding protein CP29; AltName: Full=Lhcbm4                                                 | 46.56  | 33.93    | 8                 | 8          | 14     | 280   | 29.9     | 6.60     |
| 158272804 | ser-type small GTPase [Chlamydomonas reinhardtii]                                                                        | 44.34  | 65.63    | 10                | 10         | 13     | 192   | 21.9     | 7.42     |
| 158275545 | mitochondrial ATP synthase subunit 5, OSCP subunit [Chlamydomonas reinhardtii]                                           | 41.61  | 49.36    | 10                | 10         | 13     | 233   | 25.9     | 7.37     |
| 2500073   | RecName: Full=GTP-binding protein YPTC1                                                                                  | 37.87  | 52.71    | 9                 | 9          | 12     | 203   | 22.6     | 6.21     |
| 158272172 | ribosomal protein L9 [Chlamydomonas reinhardtii]                                                                         | 37.82  | 50.26    | 9                 | 9          | 11     | 191   | 21.5     | 9.89     |
| 158276449 | small rab-related GTPase [Chlamydomonas reinhardtii]                                                                     | 36.71  | 61.50    | 9                 | 9          | 11     | 213   | 23.6     | 7.46     |
| 158280301 | predicted protein [Chlamydomonas reinhardtii]                                                                            | 35.49  | 33.91    | 8                 | 8          | 11     | 233   | 24.2     | 9.89     |
| 158275957 | peptidyl-prolyl cis-trans isomerase, cyclophilin-type [Chlamydomonas reinhardtii]                                        | 35.20  | 45.95    | 7                 | 7          | 11     | 222   | 23.6     | 9.16     |
| 158272872 | low molecular mass early light-induced protein [Chlamydomonas reinhardtii]                                               | 34.86  | 53.01    | 9                 | 9          | 13     | 249   | 27.5     | 6.15     |
| 158269914 | histone H4 [Chlamydomonas reinhardtii]                                                                                   | 29.20  | 37.23    | 4                 | 4          | 9      | 94    | 10.5     | 11.50    |
| 158271158 | rhodase-like Ca-sensing receptor [Chlamydomonas reinhardtii]                                                             | 27.19  | 25.13    | 6                 | 6          | 7      | 378   | 38.9     | 9.19     |
| 284073116 | 40S ribosomal protein S9 [Chlamydomonas reinhardtii]                                                                     | 26.70  | 38.76    | 9                 | 9          | 10     | 178   | 21.0     | 10.89    |
| 158280752 | light-harvesting protein of photosystem I [Chlamydomonas reinhardtii]                                                    | 21.87  | 29.57    | 6                 | 6          | 7      | 257   | 28.2     | 8.76     |
| 158281602 | 2-cys peroxiredoxin [Chlamydomonas reinhardtii]                                                                          | 21.22  | 44.44    | 7                 | 7          | 8      | 198   | 21.6     | 5.66     |
| 158270548 | light-harvesting complex II chlorophyll a-b binding protein M3 [Chlamydomonas reinhardtii]                               | 21.12  | 40.08    | 3                 | 5          | 5      | 257   | 27.4     | 5.96     |
| 158278261 | light-harvesting protein of photosystem I [Chlamydomonas reinhardtii]                                                    | 21.00  | 37.09    | 4                 | 4          | 5      | 213   | 22.8     | 9.00     |
| 117814    | RecName: Full=Cytochrome b6                                                                                              | 20.38  | 25.12    | 4                 | 4          | 7      | 215   | 24.1     | 8.60     |
| 158276041 | predicted protein [Chlamydomonas reinhardtii]                                                                            | 20.03  | 38.40    | 7                 | 7          | 7      | 237   | 25.3     | 9.89     |
| 266851    | RecName: Full=Photosystem I iron-sulfur center; AltName: Full=PSI-C; AltName: Full=PSI-C                                 | 19.57  | 74.07    | 5                 | 5          | 7      | 81    | 8.9      | 5.95     |
| 158272508 | predicted protein [Chlamydomonas reinhardtii]                                                                            | 18.26  | 30.04    | 5                 | 5          | 5      | 273   | 29.2     | 7.11     |
| 1717956   | RecName: Full=Cytochrome b6-f complex iron-sulfur subunit, chloroplastic; AltName: Full=Plastohydroquinone-plastoquinone | 18.20  | 32.52    | 5                 | 5          | 6      | 206   | 21.5     | 8.57     |
| 158282386 | peptidyl-prolyl cis-trans isomerase, FKBP-type [Chlamydomonas reinhardtii]                                               | 17.91  | 29.49    | 6                 | 6          | 6      | 234   | 24.9     | 9.10     |
| 18201978  | RecName: Full=30S ribosomal protein S9, chloroplastic                                                                    | 17.76  | 61.26    | 6                 | 6          | 6      | 191   | 21.0     | 9.74     |
| 158282956 | NADH:ubiquinone oxidoreductase 18 kDa subunit [Chlamydomonas reinhardtii]                                                | 17.63  | 31.52    | 4                 | 4          | 5      | 165   | 17.9     | 5.29     |
| 158277154 | light-harvesting protein of photosystem II [Chlamydomonas reinhardtii]                                                   | 17.46  | 35.34    | 3                 | 4          | 4      | 249   | 26.6     | 5.62     |
| 158275836 | chlorophyll a-b binding protein of LHCII Type I, chloroplast precursor [Chlamydomonas reinhardtii]                       | 17.05  | 33.20    | 2                 | 4          | 4      | 253   | 26.9     | 6.35     |
| 135394    | RecName: Full=Tubulin alpha-1 chain                                                                                      | 15.75  | 7.76     | 3                 | 3          | 5      | 451   | 49.6     | 5.14     |
| 158276249 | flagellar associated protein [Chlamydomonas reinhardtii]                                                                 | 15.71  | 31.63    | 4                 | 4          | 5      | 196   | 21.7     | 9.55     |
| 158282291 | flagellar flavodoxin [Chlamydomonas reinhardtii]                                                                         | 15.66  | 33.33    | 5                 | 5          | 5      | 201   | 21.4     | 7.06     |
| 1323549   | carbonic anhydrase precursor [Chlamydomonas reinhardtii]                                                                 | 15.60  | 25.47    | 5                 | 5          | 5      | 267   | 27.6     | 8.62     |
| 27542569  | light-harvesting complex I protein [Chlamydomonas reinhardtii]                                                           | 13.85  | 19.92    | 3                 | 3          | 3      | 241   | 26.2     | 8.10     |
| 158282259 | light-harvesting protein of photosystem I [Chlamydomonas reinhardtii]                                                    | 13.68  | 19.85    | 3                 | 3          | 4      | 262   | 28.4     | 8.94     |
| 2499965   | RecName: Full=Photosystem I reaction center subunit II, chloroplastic; AltName: Full=Photosystem I 20 kDa subunit; S     | 13.28  | 13.78    | 3                 | 3          | 4      | 196   | 21.3     | 10.30    |
| 158271939 | predicted protein [Chlamydomonas reinhardtii]                                                                            | 13.24  | 13.79    | 3                 | 3          | 4      | 232   | 24.2     | 9.45     |
| 158277493 | eukaryotic initiation factor [Chlamydomonas reinhardtii]                                                                 | 13.14  | 25.74    | 4                 | 4          | 4      | 202   | 23.1     | 5.35     |
| 158282209 | predicted protein [Chlamydomonas reinhardtii]                                                                            | 12.33  | 15.12    | 3                 | 3          | 4      | 258   | 28.3     | 9.58     |
| 18125     | light harvesting complex protein I-20 [Chlamydomonas reinhardtii]                                                        | 12.09  | 27.23    | 3                 | 3          | 4      | 224   | 23.5     | 8.38     |
| 158283136 | peptidyl-prolyl cis-trans isomerase, cyclophilin-type [Chlamydomonas reinhardtii]                                        | 12.02  | 19.64    | 4                 | 4          | 5      | 280   | 29.1     | 9.79     |
| 158282957 | ribosomal protein L17 [Chlamydomonas reinhardtii]                                                                        | 11.46  | 18.82    | 3                 | 3          | 4      | 186   | 21.1     | 10.33    |
| 158269830 | histone H2B [Chlamydomonas reinhardtii]                                                                                  | 11.35  | 45.21    | 3                 | 3          | 4      | 73    | 8.2      | 9.70     |
| 125987860 | RecName: Full=50S ribosomal protein L5, chloroplastic                                                                    | 10.96  | 29.61    | 5                 | 5          | 5      | 179   | 20.2     | 9.73     |
| 1245907   | Rieske protein (cytochrome b6 f complex) [Chlamydomonas reinhardtii, Peptide Partial, 27 aa, segment 1 of 2]             | 10.55  | 48.15    | 2                 | 2          | 3      | 27    | 2.8      | 6.37     |

|           |                                                                                                                       |        |       |    |    |     |     |      |       |
|-----------|-----------------------------------------------------------------------------------------------------------------------|--------|-------|----|----|-----|-----|------|-------|
| 1703151   | RecName: Full=Actin                                                                                                   | 10.38  | 9.55  | 3  | 3  | 4   | 377 | 41.8 | 5.48  |
| 27542565  | light-harvesting complex II protein [Chlamydomonas reinhardtii]                                                       | 9.63   | 23.05 | 3  | 3  | 3   | 256 | 27.5 | 6.35  |
| 158278368 | cytochrome c oxidase subunit III [Chlamydomonas reinhardtii]                                                          | 9.34   | 12.30 | 3  | 3  | 4   | 382 | 41.4 | 8.53  |
| 158274577 | membrane AAA-metalloprotease [Chlamydomonas reinhardtii]                                                              | 9.32   | 8.13  | 2  | 3  | 3   | 689 | 74.3 | 6.62  |
| 158275877 | predicted protein [Chlamydomonas reinhardtii]                                                                         | 8.90   | 14.46 | 4  | 4  | 4   | 242 | 25.6 | 9.94  |
| 158274405 | chlorophyll a-b binding protein of LHCl1 [Chlamydomonas reinhardtii]                                                  | 8.68   | 15.30 | 1  | 2  | 2   | 268 | 28.7 | 8.07  |
| 158270530 | plastidic ADP/ATP translocase [Chlamydomonas reinhardtii]                                                             | 8.32   | 4.85  | 2  | 2  | 3   | 577 | 62.3 | 9.35  |
| 158279924 | ribosomal protein S13 [Chlamydomonas reinhardtii]                                                                     | 8.32   | 29.14 | 3  | 3  | 3   | 151 | 17.1 | 10.51 |
| 158283731 | ribosomal protein L18a [Chlamydomonas reinhardtii]                                                                    | 7.97   | 23.63 | 4  | 4  | 4   | 182 | 21.4 | 10.40 |
| 1311183   | RecName: Full=Photosystem I reaction center subunit III, chloroplastic; AltName: Full=Light-harvesting complex I 17 k | 7.83   | 13.66 | 3  | 3  | 3   | 227 | 24.0 | 9.48  |
| 1311382   | RecName: Full=Oxygen-evolving enhancer protein 1, chloroplastic; Short=OEE1; Flags: Precursor                         | 7.81   | 16.15 | 3  | 3  | 3   | 291 | 30.5 | 8.16  |
| 158279720 | OEE2-like protein of thylakoid lumen [Chlamydomonas reinhardtii]                                                      | 7.41   | 13.76 | 2  | 2  | 2   | 218 | 23.6 | 9.41  |
| 158270952 | predicted protein [Chlamydomonas reinhardtii]                                                                         | 6.83   | 12.88 | 3  | 3  | 3   | 233 | 25.2 | 9.31  |
| 158271809 | heat shock protein 70A [Chlamydomonas reinhardtii]                                                                    | 6.45   | 5.53  | 3  | 3  | 3   | 651 | 71.2 | 5.38  |
| 158283480 | F1F0 ATP synthase subunit 6 [Chlamydomonas reinhardtii]                                                               | 6.29   | 7.94  | 2  | 2  | 2   | 340 | 35.5 | 9.58  |
| 15011441  | LC15 [Chlamydomonas reinhardtii]                                                                                      | 6.17   | 19.00 | 2  | 2  | 3   | 321 | 32.7 | 12.13 |
| 158277341 | plastid ribosomal protein L9 [Chlamydomonas reinhardtii]                                                              | 5.94   | 11.27 | 2  | 2  | 2   | 204 | 22.5 | 9.80  |
| 135478    | RecName: Full=Tubulin beta-1/beta-2 chain; AltName: Full=Beta-tubulin                                                 | 5.92   | 8.13  | 3  | 3  | 3   | 443 | 49.6 | 4.92  |
| 158275614 | predicted protein [Chlamydomonas reinhardtii]                                                                         | 5.65   | 14.35 | 2  | 2  | 2   | 223 | 24.8 | 9.99  |
| 158279575 | membrane AAA-metalloprotease [Chlamydomonas reinhardtii]                                                              | 5.48   | 3.99  | 1  | 2  | 2   | 727 | 77.5 | 5.90  |
| 17432909  | RecName: Full=ATP synthase subunit a, chloroplastic; AltName: Full=ATP synthase FO sector subunit a; AltName: Full=   | 5.24   | 11.76 | 2  | 2  | 3   | 238 | 26.2 | 4.70  |
| 158278438 | ARF-like GTPase [Chlamydomonas reinhardtii]                                                                           | 5.21   | 16.22 | 2  | 2  | 2   | 185 | 20.6 | 5.72  |
| 1702984   | RecName: Full=14-3-3-like protein                                                                                     | 5.17   | 6.95  | 2  | 2  | 2   | 259 | 29.5 | 5.00  |
| 158283935 | hypothetical protein CHL1REDRAFT_183568 [Chlamydomonas reinhardtii]                                                   | 5.13   | 11.42 | 2  | 2  | 2   | 219 | 23.8 | 8.63  |
| 158279650 | E3 ubiquitin ligase [Chlamydomonas reinhardtii]                                                                       | 5.11   | 21.66 | 3  | 3  | 3   | 157 | 17.9 | 4.70  |
| 158275273 | luminal PspB-like protein [Chlamydomonas reinhardtii]                                                                 | 4.98   | 7.78  | 2  | 2  | 2   | 257 | 28.4 | 9.01  |
| 113465    | RecName: Full=ADP-ATP carrier protein; AltName: Full=ADP/ATP translocase; AltName: Full=Adenine nucleotide transk     | 4.85   | 7.14  | 2  | 2  | 2   | 308 | 33.5 | 9.74  |
| 158281739 | ribosomal protein S3 [Chlamydomonas reinhardtii]                                                                      | 4.73   | 8.70  | 2  | 2  | 2   | 230 | 25.8 | 9.64  |
| 158282786 | plastid ribosomal protein L13 [Chlamydomonas reinhardtii]                                                             | 4.60   | 10.22 | 2  | 2  | 2   | 225 | 24.5 | 10.20 |
| 158269913 | histone H2A [Chlamydomonas reinhardtii]                                                                               | 4.49   | 13.33 | 2  | 2  | 2   | 120 | 12.7 | 10.04 |
| 75338601  | RecName: Full=Dynein light chain 1, axonemal; AltName: Full=Flagellar outer arm dynein light chain 1                  | 3.87   | 10.10 | 2  | 2  | 2   | 198 | 22.1 | 5.74  |
| 158272892 | small arf-related GTPase ARFRP1 [Chlamydomonas reinhardtii]                                                           | 3.72   | 11.94 | 2  | 2  | 2   | 201 | 22.7 | 9.17  |
| 158269042 | histone H3 [Chlamydomonas reinhardtii]                                                                                | 3.72   | 27.38 | 3  | 3  | 3   | 84  | 9.6  | 11.74 |
| 158275158 | plastid ribosomal protein L6 [Chlamydomonas reinhardtii]                                                              | 2.37   | 7.73  | 2  | 2  | 2   | 207 | 22.2 | 10.35 |
| 224593221 | translation elongation factor-like protein [Chlamydomonas reinhardtii]                                                | 2.27   | 5.00  | 2  | 2  | 2   | 320 | 35.3 | 7.87  |
| 125090    | Keratin, type I microfibrillar 48 kDa, component 8C-1 OS=Ovis aries PE=1 SV=2                                         | 919.47 | 78.64 | 11 | 40 | 386 | 412 | 46.6 | 4.81  |
| 125091    | Keratin, type I microfibrillar, 47.6 kDa OS=Ovis aries PE=3 SV=2                                                      | 675.43 | 69.55 | 6  | 36 | 304 | 404 | 46.0 | 4.93  |
| 125117    | Keratin, type II microfibrillar, component 5 OS=Ovis aries PE=1 SV=1                                                  | 653.65 | 79.88 | 24 | 56 | 258 | 502 | 55.2 | 6.46  |
| 125116    | Keratin, type II microfibrillar, component 7C OS=Ovis aries PE=1 SV=1                                                 | 638.98 | 75.15 | 21 | 49 | 286 | 491 | 53.6 | 5.57  |
| 48474780  | Keratin, type II cuticular Hb5 OS=Homo sapiens GN=KRT85 PE=1 SV=1                                                     | 474.21 | 50.69 | 2  | 36 | 208 | 507 | 55.8 | 6.55  |
| 311033435 | Keratin, type II cuticular Hb1 OS=Homo sapiens GN=KRT81 PE=1 SV=3                                                     | 391.98 | 48.91 | 5  | 32 | 199 | 505 | 54.9 | 5.47  |
| 223590075 | Keratin, type I cuticular Ha3-1 OS=Homo sapiens GN=KRT33A PE=2 SV=2                                                   | 298.32 | 36.14 | 3  | 21 | 158 | 404 | 45.9 | 4.82  |
| 148887391 | Keratin, type II cuticular Hb2 OS=Homo sapiens GN=KRT82 PE=1 SV=3                                                     | 233.30 | 16.76 | 3  | 12 | 89  | 513 | 56.6 | 6.74  |
| 6486299   | Keratin, type I cuticular Ha3-II OS=Homo sapiens GN=KRT33B PE=2 SV=3                                                  | 226.84 | 32.43 | 3  | 15 | 138 | 404 | 46.2 | 4.84  |
| 125115    | Keratin, type II microfibrillar (Fragment) OS=Ovis aries PE=1 SV=1                                                    | 221.00 | 95.41 | 11 | 17 | 73  | 109 | 12.7 | 4.59  |
| 296439499 | Keratin, type I cuticular Ha5 OS=Homo sapiens GN=KRT35 PE=2 SV=5                                                      | 216.18 | 30.77 | 7  | 21 | 81  | 455 | 50.3 | 4.91  |
| 6485565   | Keratin, type I cuticular Ha6 OS=Homo sapiens GN=KRT36 PE=1 SV=1                                                      | 144.08 | 25.27 | 4  | 13 | 80  | 467 | 52.2 | 4.94  |
| 311033432 | Keratin, type I cuticular Ha2 OS=Homo sapiens GN=KRT32 PE=1 SV=3                                                      | 114.13 | 17.63 | 2  | 11 | 69  | 448 | 50.3 | 4.84  |
| 249849769 | Keratin, type I cytoskeletal 10 OS=Homo sapiens GN=KRT10 PE=1 SV=6                                                    | 68.60  | 45.03 | 16 | 18 | 23  | 584 | 58.8 | 5.21  |
| 238054406 | Keratin, type II cytoskeletal 1 OS=Homo sapiens GN=KRT11 PE=1 SV=6                                                    | 52.34  | 32.45 | 14 | 16 | 18  | 644 | 66.0 | 8.12  |
| 136429    | Trypsin OS=Sus scrofa PE=1 SV=1                                                                                       | 45.55  | 25.11 | 4  | 4  | 17  | 231 | 24.4 | 7.18  |
| 239938886 | Keratin, type I cytoskeletal 9 OS=Homo sapiens GN=KRT9 PE=1 SV=3                                                      | 29.05  | 21.67 | 8  | 9  | 10  | 623 | 62.0 | 5.24  |
| 239938850 | Keratin, type II cytoskeletal 2 epidermal OS=Homo sapiens GN=KRT2 PE=1 SV=2                                           | 25.03  | 20.19 | 9  | 11 | 11  | 639 | 65.4 | 8.00  |
| 547810    | Keratin-associated protein 6-1 OS=Ovis aries GN=KRTAP6-1 PE=1 SV=2                                                    | 16.60  | 56.63 | 3  | 3  | 6   | 83  | 8.4  | 8.22  |
| 125644    | Keratin, high-sulfur matrix protein, IIIA3 OS=Ovis aries PE=1 SV=1                                                    | 16.33  | 24.43 | 1  | 2  | 5   | 131 | 14.2 | 8.12  |
| 125633    | Keratin, high-sulfur matrix protein, IIIA3A OS=Ovis aries PE=1 SV=1                                                   | 9.39   | 26.92 | 1  | 2  | 4   | 130 | 13.9 | 8.06  |



## B)

| Accession        | Description                                                                                                            | Score        | Coverage     | # Unique Peptides | # Peptides | # PSMs   | # AAs      | MW [kDa]    | calc. pl    |
|------------------|------------------------------------------------------------------------------------------------------------------------|--------------|--------------|-------------------|------------|----------|------------|-------------|-------------|
| 131389           | RecName: Full=Oxygen-evolving enhancer protein 2, chloroplastic; Short=OEE2; Flags: Precursor                          | 236.50       | 65.31        | 19                | 19         | 143      | 245        | 25.9        | 9.11        |
| 158282427        | light-harvesting protein of photosystem I [Chlamydomonas reinhardtii]                                                  | 144.33       | 69.55        | 10                | 10         | 67       | 243        | 25.9        | 9.00        |
| 158273869        | light-harvesting protein I [Chlamydomonas reinhardtii]                                                                 | 77.16        | 65.81        | 10                | 10         | 27       | 257        | 27.8        | 8.97        |
| 60391855         | RecName: Full=Chlorophyll a-b binding protein CP29; AltName: Full=Lhcbm4                                               | 61.82        | 34.29        | 9                 | 9          | 31       | 280        | 29.9        | 6.60        |
| 1323549          | carbonic anhydrase precursor [Chlamydomonas reinhardtii]                                                               | 51.06        | 44.57        | 9                 | 9          | 22       | 267        | 27.6        | 8.62        |
| 158272804        | sar-type small GTPase [Chlamydomonas reinhardtii]                                                                      | 50.16        | 69.27        | 12                | 12         | 23       | 192        | 21.9        | 7.42        |
| 158275545        | mitochondrial ATP synthase subunit 5, OSCP subunit [Chlamydomonas reinhardtii]                                         | 47.28        | 56.22        | 15                | 15         | 29       | 233        | 25.9        | 7.37        |
| 2493039          | RecName: Full=ATP synthase delta chain, chloroplastic; AltName: Full=F-ATPase delta chain; Flags: Precursor            | 47.17        | 38.36        | 13                | 13         | 18       | 219        | 24.0        | 8.72        |
| 158279717        | light-harvesting protein of photosystem I [Chlamydomonas reinhardtii]                                                  | 46.50        | 33.74        | 9                 | 9          | 34       | 246        | 26.9        | 8.65        |
| 158271158        | rhodanese-like Ca-sensing receptor [Chlamydomonas reinhardtii]                                                         | 41.76        | 39.15        | 12                | 12         | 20       | 378        | 38.9        | 9.19        |
| 158272872        | low molecular mass early light-induced protein [Chlamydomonas reinhardtii]                                             | 40.56        | 37.75        | 9                 | 9          | 23       | 249        | 27.5        | 6.15        |
| 158280301        | predicted protein [Chlamydomonas reinhardtii]                                                                          | 39.46        | 36.91        | 9                 | 9          | 16       | 233        | 24.2        | 9.89        |
| 158275957        | peptidyl-prolyl cis-trans isomerase, cyclophilin-type [Chlamydomonas reinhardtii]                                      | 38.84        | 51.35        | 11                | 11         | 20       | 222        | 23.6        | 9.16        |
| 158277154        | light-harvesting protein of photosystem II [Chlamydomonas reinhardtii]                                                 | 34.92        | 39.36        | 3                 | 6          | 13       | 249        | 26.6        | 5.62        |
| 2500073          | RecName: Full=GTP-binding protein YPTC1                                                                                | 34.83        | 52.22        | 8                 | 9          | 15       | 203        | 22.6        | 6.21        |
| 158281602        | 2-cys peroxiredoxin [Chlamydomonas reinhardtii]                                                                        | 34.10        | 60.61        | 9                 | 9          | 17       | 198        | 21.6        | 5.66        |
| 158272172        | ribosomal protein L9 [Chlamydomonas reinhardtii]                                                                       | 33.21        | 54.45        | 10                | 10         | 16       | 191        | 21.5        | 9.89        |
| 158270548        | light-harvesting complex II chlorophyll a-b binding protein M3 [Chlamydomonas reinhardtii]                             | 32.30        | 43.97        | 3                 | 7          | 17       | 257        | 27.4        | 5.96        |
| 40714511         | light-harvesting chlorophyll a/b protein of photosystem I (Type II) [Chlamydomonas reinhardtii]                        | 31.87        | 35.58        | 5                 | 5          | 14       | 267        | 28.9        | 8.32        |
| 158275836        | chlorophyll a-b binding protein of LHClI type I, chloroplast precursor [Chlamydomonas reinhardtii]                     | 31.29        | 41.50        | 3                 | 7          | 14       | 253        | 26.9        | 6.35        |
| 158274405        | chlorophyll a-b binding protein of LHClI [Chlamydomonas reinhardtii]                                                   | 28.85        | 35.82        | 4                 | 7          | 12       | 268        | 28.7        | 8.07        |
| 158270530        | plastidic ADP/ATP translocase [Chlamydomonas reinhardtii]                                                              | 27.54        | 19.41        | 9                 | 9          | 13       | 577        | 62.3        | 9.35        |
| 158280752        | light-harvesting protein of photosystem I [Chlamydomonas reinhardtii]                                                  | 27.06        | 45.53        | 9                 | 9          | 16       | 257        | 28.2        | 8.76        |
| 284073116        | 40S ribosomal protein S9 [Chlamydomonas reinhardtii]                                                                   | 26.14        | 53.37        | 11                | 11         | 18       | 178        | 21.0        | 10.89       |
| 117814           | RecName: Full=Cytochrome b6                                                                                            | 24.41        | 28.84        | 5                 | 5          | 11       | 215        | 24.1        | 8.60        |
| 158282956        | NADH:ubiquinone oxidoreductase 18 kDa subunit [Chlamydomonas reinhardtii]                                              | 24.15        | 61.21        | 7                 | 7          | 12       | 165        | 17.9        | 5.29        |
| 27542565         | light-harvesting complex II protein [Chlamydomonas reinhardtii]                                                        | 21.72        | 17.58        | 2                 | 4          | 8        | 256        | 27.5        | 6.35        |
| 266851           | RecName: Full=Photosystem I iron-sulfur center; AltName: Full=PSI-C; AltName: Full=                                    | 19.94        | 64.20        | 5                 | 5          | 11       | 81         | 8.9         | 5.95        |
| 158280416        | GR008 protein [Chlamydomonas reinhardtii]                                                                              | 19.82        | 35.00        | 10                | 10         | 11       | 300        | 32.8        | 7.12        |
| 2499965          | RecName: Full=Photosystem I reaction center subunit II, chloroplastic; AltName: Full=Photosystem I 20 kDa subunit; Sh  | 19.26        | 33.67        | 9                 | 9          | 12       | 196        | 21.3        | 10.30       |
| 27542569         | light-harvesting complex I protein [Chlamydomonas reinhardtii]                                                         | 18.66        | 39.83        | 7                 | 7          | 12       | 241        | 26.2        | 8.10        |
| 158273974        | CP1D51 protein required for cyt b6 assembly [Chlamydomonas reinhardtii]                                                | 16.59        | 27.14        | 7                 | 7          | 11       | 269        | 29.6        | 9.06        |
| 158276449        | small rab-related GTPase [Chlamydomonas reinhardtii]                                                                   | 16.23        | 57.28        | 11                | 11         | 14       | 213        | 23.6        | 7.46        |
| 131382           | RecName: Full=Oxygen-evolving enhancer protein 1, chloroplastic; Short=OEE1; Flags: Precursor                          | 15.48        | 45.36        | 10                | 10         | 10       | 291        | 30.5        | 8.16        |
| 158282291        | flagellar flavodoxin [Chlamydomonas reinhardtii]                                                                       | 14.86        | 45.77        | 3                 | 8          | 10       | 201        | 21.4        | 7.06        |
| 158274577        | membrane AAA-metalloprotease [Chlamydomonas reinhardtii]                                                               | 14.31        | 11.18        | 6                 | 6          | 6        | 689        | 74.3        | 6.62        |
| 158276041        | predicted protein [Chlamydomonas reinhardtii]                                                                          | 14.14        | 61.60        | 10                | 10         | 12       | 237        | 25.3        | 9.89        |
| 131183           | RecName: Full=Photosystem I reaction center subunit III, chloroplastic; AltName: Full=Light-harvesting complex I 17 kD | 13.86        | 30.84        | 6                 | 6          | 7        | 227        | 24.0        | 9.48        |
| <b>158283346</b> | <b>chloroplast photosystem II-associated 22 kDa protein [Chlamydomonas reinhardtii]</b>                                | <b>13.82</b> | <b>32.65</b> | <b>7</b>          | <b>7</b>   | <b>8</b> | <b>245</b> | <b>26.1</b> | <b>6.87</b> |
| 158279720        | OEE2-like protein of thylakoid lumen [Chlamydomonas reinhardtii]                                                       | 13.15        | 43.12        | 7                 | 7          | 8        | 218        | 23.6        | 9.41        |
| 158282386        | peptidyl-prolyl cis-trans isomerase, FKBP-type [Chlamydomonas reinhardtii]                                             | 13.03        | 28.63        | 6                 | 6          | 8        | 234        | 24.9        | 9.10        |
| 158273823        | ribosomal protein L21 [Chlamydomonas reinhardtii]                                                                      | 12.64        | 38.65        | 7                 | 7          | 9        | 163        | 18.3        | 10.78       |
| 158275309        | stress-related chlorophyll a/b binding protein 3 [Chlamydomonas reinhardtii]                                           | 12.57        | 37.45        | 5                 | 6          | 8        | 259        | 28.2        | 4.98        |
| 131290           | RecName: Full=Photosystem II D2 protein; Short=PSII D2 protein; AltName: Full=Photosystem Q(A) protein                 | 12.34        | 14.77        | 4                 | 4          | 5        | 352        | 39.4        | 5.73        |
| 125987860        | RecName: Full=50S ribosomal protein L5, chloroplastic                                                                  | 12.30        | 52.51        | 9                 | 9          | 9        | 179        | 20.2        | 9.73        |
| 158283731        | ribosomal protein L18a [Chlamydomonas reinhardtii]                                                                     | 12.12        | 48.90        | 9                 | 9          | 10       | 182        | 21.4        | 10.40       |
| 158277111        | ribosomal protein L13a [Chlamydomonas reinhardtii]                                                                     | 11.89        | 32.43        | 6                 | 6          | 7        | 185        | 20.7        | 11.30       |

|           |                                                                                                                      |       |       |    |    |    |     |      |       |
|-----------|----------------------------------------------------------------------------------------------------------------------|-------|-------|----|----|----|-----|------|-------|
| 158278474 | low-CO2-inducible chloroplast envelope protein [Chlamydomonas reinhardtii]                                           | 11.43 | 24.23 | 1  | 7  | 8  | 355 | 38.0 | 8.68  |
| 158278383 | low-CO2-inducible chloroplast envelope protein [Chlamydomonas reinhardtii]                                           | 11.40 | 29.61 | 3  | 9  | 10 | 358 | 38.3 | 8.85  |
| 158275883 | ribosomal protein S5 [Chlamydomonas reinhardtii]                                                                     | 11.31 | 29.02 | 5  | 5  | 5  | 193 | 21.7 | 9.79  |
| 158271777 | zeta-cop. subunit of COP-1 complex [Chlamydomonas reinhardtii]                                                       | 11.28 | 25.00 | 4  | 4  | 6  | 184 | 20.5 | 4.91  |
| 158278402 | R-SNARE protein, VAMP72-family [Chlamydomonas reinhardtii]                                                           | 11.23 | 39.27 | 9  | 9  | 10 | 219 | 25.2 | 8.21  |
| 158277493 | eukaryotic initiation factor [Chlamydomonas reinhardtii]                                                             | 11.23 | 39.11 | 7  | 7  | 7  | 202 | 23.1 | 5.35  |
| 158279739 | predicted protein [Chlamydomonas reinhardtii]                                                                        | 11.03 | 50.43 | 6  | 6  | 7  | 232 | 24.2 | 9.45  |
| 1717956   | RecName: Full=Cytochrome b6-F complex iron-sulfur subunit, chloroplastic; AltName: Full=Plastohydroquinone:plastocya | 11.02 | 35.44 | 5  | 5  | 8  | 206 | 21.5 | 8.57  |
| 158276249 | flagellar associated protein [Chlamydomonas reinhardtii]                                                             | 10.99 | 57.65 | 8  | 8  | 9  | 196 | 21.7 | 9.55  |
| 158283935 | hypothetical protein CHLREDRAFT_183568 [Chlamydomonas reinhardtii]                                                   | 10.98 | 37.90 | 6  | 6  | 7  | 219 | 23.8 | 8.63  |
| 158282292 | flagellar flavodoxin [Chlamydomonas reinhardtii]                                                                     | 10.92 | 29.85 | 1  | 6  | 7  | 201 | 21.4 | 6.70  |
| 75058787  | Keratin, type I cytoskeletal 15 OS=Ovis aries GN=KRT15 PE=2 SV=1                                                     | 10.89 | 10.38 | 1  | 6  | 12 | 453 | 48.7 | 4.79  |
| 15827573  | luminal PsbP-like protein [Chlamydomonas reinhardtii]                                                                | 10.55 | 22.96 | 6  | 6  | 6  | 257 | 28.4 | 9.01  |
| 158272508 | predicted protein [Chlamydomonas reinhardtii]                                                                        | 10.44 | 25.64 | 5  | 5  | 6  | 273 | 29.2 | 7.11  |
| 40714509  | light-harvesting chlorophyll-a/b protein of photosystem I [Chlamydomonas reinhardtii]                                | 10.43 | 30.30 | 5  | 5  | 6  | 264 | 28.7 | 9.13  |
| 124484361 | transcription regulator Pbt-2 [Chlamydomonas reinhardtii]                                                            | 10.43 | 30.25 | 5  | 5  | 5  | 238 | 24.9 | 9.60  |
| 158279575 | membrane AAA-metalloprotease [Chlamydomonas reinhardtii]                                                             | 10.38 | 13.76 | 7  | 7  | 8  | 727 | 77.5 | 5.90  |
| 158275158 | plastid ribosomal protein L6 [Chlamydomonas reinhardtii]                                                             | 10.15 | 31.88 | 6  | 6  | 7  | 207 | 22.2 | 10.35 |
| 158280089 | predicted protein [Chlamydomonas reinhardtii]                                                                        | 10.09 | 33.18 | 5  | 5  | 5  | 223 | 24.2 | 10.62 |
| 132167    | RecName: Full=Ribulose biphosphate carboxylase/oxygenase activase, chloroplastic; Short=RA; Short=Rubisco activase   | 9.96  | 12.99 | 4  | 4  | 7  | 408 | 45.0 | 8.54  |
| 158270661 | peptidyl-Ima hydrolase [Chlamydomonas reinhardtii]                                                                   | 9.91  | 49.14 | 4  | 4  | 4  | 116 | 12.2 | 8.48  |
| 158275654 | predicted protein [Chlamydomonas reinhardtii]                                                                        | 9.89  | 29.32 | 4  | 4  | 4  | 191 | 21.1 | 7.62  |
| 158278261 | light-harvesting protein of photosystem I [Chlamydomonas reinhardtii]                                                | 9.87  | 32.86 | 4  | 4  | 8  | 213 | 22.8 | 9.00  |
| 158282793 | eukaryotic translation elongation factor 1 alpha 1 [Chlamydomonas reinhardtii]                                       | 9.80  | 21.81 | 10 | 10 | 10 | 463 | 50.8 | 8.54  |
| 158275368 | mitochondrial substrate carrier protein [Chlamydomonas reinhardtii]                                                  | 9.09  | 18.39 | 4  | 4  | 5  | 299 | 31.6 | 9.76  |
| 158282957 | ribosomal protein L17 [Chlamydomonas reinhardtii]                                                                    | 9.09  | 23.66 | 4  | 4  | 5  | 186 | 21.1 | 10.33 |
| 18201978  | RecName: Full=30S ribosomal protein S9, chloroplastic                                                                | 9.05  | 21.47 | 4  | 4  | 4  | 191 | 21.0 | 9.74  |
| 131242    | RecName: Full=Photosystem C(B) protein; AltName: Full=32 kDa thylakoid membrane protein; AltName: Full=Photosyst     | 8.78  | 16.48 | 5  | 5  | 5  | 352 | 39.0 | 5.50  |
| 158281401 | magnesium chelatase subunit D [Chlamydomonas reinhardtii]                                                            | 8.50  | 12.26 | 7  | 7  | 7  | 767 | 82.6 | 5.80  |
| 158270952 | predicted protein [Chlamydomonas reinhardtii]                                                                        | 8.39  | 40.34 | 8  | 8  | 8  | 233 | 25.2 | 9.31  |
| 158275877 | predicted protein [Chlamydomonas reinhardtii]                                                                        | 8.27  | 35.12 | 7  | 7  | 7  | 242 | 25.6 | 9.94  |
| 158275614 | predicted protein [Chlamydomonas reinhardtii]                                                                        | 8.02  | 34.08 | 5  | 5  | 5  | 223 | 24.8 | 9.99  |
| 158278804 | predicted protein [Chlamydomonas reinhardtii]                                                                        | 7.98  | 25.20 | 5  | 5  | 6  | 246 | 26.6 | 9.85  |
| 158279571 | ribosomal protein L18 [Chlamydomonas reinhardtii]                                                                    | 7.62  | 26.20 | 4  | 4  | 4  | 187 | 20.9 | 11.17 |
| 158273394 | flagellar associated protein [Chlamydomonas reinhardtii]                                                             | 7.62  | 15.23 | 4  | 4  | 5  | 302 | 32.6 | 6.52  |
| 158275296 | stress-related chlorophyll a/b binding protein 1 [Chlamydomonas reinhardtii]                                         | 7.27  | 30.43 | 3  | 4  | 4  | 253 | 27.5 | 5.05  |
| 158275934 | ribosomal protein L23a [Chlamydomonas reinhardtii]                                                                   | 7.26  | 31.29 | 4  | 4  | 4  | 147 | 16.4 | 10.14 |
| 158276000 | ribosomal protein L32 [Chlamydomonas reinhardtii]                                                                    | 6.99  | 45.86 | 6  | 6  | 6  | 133 | 15.5 | 11.18 |
| 158278368 | cytochrome c oxidase subunit III [Chlamydomonas reinhardtii]                                                         | 6.91  | 12.30 | 3  | 3  | 5  | 382 | 41.4 | 8.53  |
| 158278750 | fibrillin [Chlamydomonas reinhardtii]                                                                                | 6.82  | 25.63 | 4  | 4  | 4  | 199 | 22.0 | 8.43  |
| 158283136 | peptidyl-prolyl cis-trans isomerase, cyclophilin-type [Chlamydomonas reinhardtii]                                    | 6.77  | 27.14 | 6  | 6  | 8  | 280 | 29.1 | 9.79  |
| 6685565   | Keratin, type I cuticular Ha6 OS=Homo sapiens GN=KRT136 PE=1 SV=1                                                    | 6.67  | 6.00  | 1  | 3  | 4  | 467 | 52.2 | 4.94  |
| 158277204 | R-SNARE protein, Sec22-family [Chlamydomonas reinhardtii]                                                            | 6.65  | 21.46 | 4  | 4  | 4  | 219 | 25.1 | 9.47  |
| 158282209 | predicted protein [Chlamydomonas reinhardtii]                                                                        | 6.62  | 32.17 | 7  | 7  | 8  | 258 | 28.3 | 9.58  |
| 158272892 | small arf-related GTPase ARF-RP1 [Chlamydomonas reinhardtii]                                                         | 6.53  | 27.36 | 4  | 4  | 4  | 201 | 22.7 | 9.17  |
| 158280354 | hypothetical protein CHLREDRAFT_188153 [Chlamydomonas reinhardtii]                                                   | 6.45  | 12.24 | 5  | 5  | 5  | 392 | 41.3 | 9.04  |
| 158281106 | peroxiredoxin type II [Chlamydomonas reinhardtii]                                                                    | 6.44  | 33.19 | 7  | 7  | 7  | 226 | 24.4 | 8.76  |
| 1350947   | RecName: Full=40S ribosomal protein S18                                                                              | 6.39  | 32.03 | 5  | 5  | 5  | 153 | 17.4 | 10.48 |
| 158271807 | TatB-like sec-independent protein translocon subunit [Chlamydomonas reinhardtii]                                     | 6.36  | 20.54 | 4  | 4  | 4  | 224 | 22.7 | 10.26 |
| 158282264 | 110 kDa translocon of chloroplast envelope inner membrane [Chlamydomonas reinhardtii]                                | 6.35  | 7.68  | 4  | 4  | 4  | 703 | 78.9 | 6.93  |

|           |                                                                                                                                                             |      |       |   |   |   |      |       |       |
|-----------|-------------------------------------------------------------------------------------------------------------------------------------------------------------|------|-------|---|---|---|------|-------|-------|
| 158273732 | mitochondrial transcription termination factor [Chlamydomonas reinhardtii]                                                                                  | 6.29 | 34.62 | 6 | 6 | 6 | 234  | 25.7  | 9.41  |
| 128635    | RecName: Full=NADH-ubiquinone oxidoreductase chain 1; AltName: Full=NADH dehydrogenase subunit 1                                                            | 6.27 | 5.48  | 3 | 3 | 4 | 292  | 31.6  | 7.02  |
| 158276683 | glycine-rich RNA-binding protein [Chlamydomonas reinhardtii]                                                                                                | 6.08 | 21.82 | 3 | 3 | 3 | 165  | 15.8  | 8.41  |
| 158283480 | F1F0 ATP synthase subunit 6 [Chlamydomonas reinhardtii]                                                                                                     | 6.03 | 7.94  | 2 | 2 | 4 | 340  | 35.5  | 9.58  |
| 113465    | RecName: Full=ADP,ATP carrier protein; AltName: Full=Adenine nucleotide transloc; RecName: Full=ATPase, ras GTPase-like protein [Chlamydomonas reinhardtii] | 5.97 | 16.23 | 5 | 5 | 5 | 308  | 33.5  | 9.74  |
| 158283657 | flagellar ATPase, ras GTPase-like protein [Chlamydomonas reinhardtii]                                                                                       | 5.87 | 24.48 | 4 | 4 | 4 | 192  | 21.3  | 5.60  |
| 217315585 | ATP synthase CF1 alpha subunit [Chlamydomonas reinhardtii]                                                                                                  | 5.68 | 13.24 | 3 | 3 | 3 | 272  | 29.1  | 5.25  |
| 1173201   | RecName: Full=40S ribosomal protein S14                                                                                                                     | 5.62 | 22.22 | 3 | 3 | 3 | 153  | 16.3  | 10.32 |
| 158277797 | translocase of outer mitochondrial membrane [Chlamydomonas reinhardtii]                                                                                     | 5.57 | 28.86 | 4 | 4 | 4 | 201  | 21.7  | 5.00  |
| 131395    | RecName: Full=Oxygen-evolving enhancer protein 3, chloroplastic; Short=OEE3; Flags: Precursor                                                               | 5.55 | 17.09 | 3 | 3 | 3 | 199  | 21.8  | 9.58  |
| 1245907   | Rieske protein (cytochrome b6 f complex) [Chlamydomonas reinhardtii]; Peptide Partial, 27 aa, segment 1 of 2                                                | 5.54 | 48.15 | 2 | 2 | 3 | 207  | 22.2  | 6.37  |
| 158275019 | mitochondrial F1F0 ATP synthase associated 19.5 kDa protein [Chlamydomonas reinhardtii]                                                                     | 5.44 | 18.84 | 3 | 3 | 3 | 27   | 22.2  | 9.55  |
| 158272413 | peptidyl-prolyl cis-trans isomerase, cyclophilin-type [Chlamydomonas reinhardtii]                                                                           | 5.27 | 22.67 | 3 | 3 | 3 | 172  | 18.4  | 7.78  |
| 158271626 | predicted protein [Chlamydomonas reinhardtii]                                                                                                               | 5.27 | 20.65 | 4 | 4 | 4 | 276  | 29.6  | 8.84  |
| 158284019 | predicted protein [Chlamydomonas reinhardtii]                                                                                                               | 5.23 | 13.51 | 2 | 2 | 2 | 148  | 16.2  | 9.74  |
| 158270522 | predicted protein [Chlamydomonas reinhardtii]                                                                                                               | 5.02 | 27.61 | 3 | 3 | 3 | 134  | 14.4  | 10.05 |
| 25090906  | RecName: Full=Cytochrome b6-f complex subunit v; AltName: Full=Cytochrome b6-f complex subunit v                                                            | 4.99 | 38.89 | 5 | 5 | 5 | 198  | 20.2  | 9.92  |
| 158283348 | glutathione S-transferase, mitochondrial [Chlamydomonas reinhardtii]                                                                                        | 4.96 | 10.33 | 2 | 2 | 2 | 242  | 26.4  | 9.36  |
| 158284016 | predicted protein [Chlamydomonas reinhardtii]                                                                                                               | 4.95 | 18.18 | 3 | 3 | 3 | 264  | 26.5  | 8.70  |
| 158279001 | predicted protein [Chlamydomonas reinhardtii]                                                                                                               | 4.92 | 9.77  | 3 | 3 | 3 | 348  | 36.2  | 9.66  |
| 158274884 | ribosomal protein L12 [Chlamydomonas reinhardtii]                                                                                                           | 4.83 | 34.94 | 4 | 4 | 4 | 166  | 17.6  | 9.06  |
| 158278749 | plastid lipid associated protein [Chlamydomonas reinhardtii]                                                                                                | 4.76 | 10.95 | 3 | 3 | 3 | 347  | 36.4  | 11.05 |
| 158274972 | acidic ribosomal protein P0 [Chlamydomonas reinhardtii]                                                                                                     | 4.71 | 7.19  | 2 | 2 | 2 | 320  | 34.6  | 6.42  |
| 158283478 | predicted protein [Chlamydomonas reinhardtii]                                                                                                               | 4.54 | 3.46  | 3 | 3 | 3 | 1328 | 135.7 | 7.23  |
| 1418674   | ubiquinol-cytochrome c oxidoreductase [Chlamydomonas reinhardtii]                                                                                           | 4.53 | 13.41 | 3 | 3 | 3 | 261  | 28.4  | 8.09  |
| 158274929 | signal peptidase, 25 kDa subunit [Chlamydomonas reinhardtii]                                                                                                | 4.51 | 12.63 | 2 | 2 | 2 | 198  | 21.6  | 6.58  |
| 158281981 | aspartate aminotransferase [Chlamydomonas reinhardtii]                                                                                                      | 4.48 | 7.71  | 3 | 3 | 3 | 428  | 47.0  | 8.92  |
| 158283202 | mitochondrial cytochrome c oxidase subunit 4, 13 kD [Chlamydomonas reinhardtii]                                                                             | 4.46 | 17.71 | 2 | 2 | 2 | 175  | 19.0  | 5.27  |
| 158271676 | ribosomal protein L28 [Chlamydomonas reinhardtii]                                                                                                           | 4.46 | 23.73 | 4 | 4 | 4 | 177  | 19.5  | 10.83 |
| 158273022 | predicted protein [Chlamydomonas reinhardtii]                                                                                                               | 4.46 | 20.27 | 3 | 3 | 3 | 222  | 24.4  | 10.23 |
| 262527093 | large subunit of ribulose-1, 5-bisphosphate carboxylase/oxygenase [Chlamydomonas reinhardtii]                                                               | 4.45 | 10.64 | 4 | 4 | 4 | 376  | 41.9  | 7.30  |
| 158282786 | plastid ribosomal protein L13 [Chlamydomonas reinhardtii]                                                                                                   | 4.41 | 19.56 | 4 | 4 | 4 | 225  | 24.5  | 10.20 |
| 158281596 | ribosomal protein L27a [Chlamydomonas reinhardtii]                                                                                                          | 4.41 | 26.53 | 4 | 4 | 4 | 147  | 16.4  | 10.43 |
| 158275974 | predicted protein [Chlamydomonas reinhardtii]                                                                                                               | 4.39 | 7.91  | 2 | 2 | 2 | 316  | 32.9  | 9.72  |
| 158269914 | histone H4 [Chlamydomonas reinhardtii]                                                                                                                      | 4.35 | 34.04 | 3 | 3 | 3 | 94   | 10.5  | 11.50 |
| 158280397 | predicted protein [Chlamydomonas reinhardtii]                                                                                                               | 4.29 | 7.45  | 2 | 2 | 2 | 322  | 33.1  | 9.69  |
| 18125     | light harvesting complex protein L20 [Chlamydomonas reinhardtii]                                                                                            | 4.29 | 16.96 | 2 | 2 | 3 | 224  | 23.5  | 8.38  |
| 131278    | RecName: Full=Photosystem II CP43 chlorophyll apoprotein; AltName: Full=PS II 43 kDa protein; AltName: Full=Photosys                                        | 4.26 | 9.11  | 3 | 3 | 3 | 461  | 50.6  | 6.34  |
| 158277987 | predicted protein [Chlamydomonas reinhardtii]                                                                                                               | 4.26 | 21.90 | 3 | 3 | 3 | 137  | 15.5  | 8.51  |
| 158275121 | rieske [2Fe-2S] protein [Chlamydomonas reinhardtii]                                                                                                         | 4.25 | 8.82  | 2 | 2 | 2 | 306  | 33.2  | 8.09  |
| 158275715 | component of TRAPP complex [Chlamydomonas reinhardtii]                                                                                                      | 4.20 | 21.36 | 4 | 4 | 5 | 206  | 23.5  | 9.04  |
| 158270827 | small rab-related GTPase [Chlamydomonas reinhardtii]                                                                                                        | 4.19 | 10.09 | 1 | 2 | 4 | 218  | 24.2  | 8.15  |
| 158274126 | predicted protein [Chlamydomonas reinhardtii]                                                                                                               | 3.99 | 12.68 | 2 | 2 | 2 | 213  | 23.2  | 6.87  |
| 158282108 | ribosomal protein S24 [Chlamydomonas reinhardtii]                                                                                                           | 3.97 | 32.06 | 4 | 4 | 4 | 131  | 15.1  | 10.62 |
| 1730149   | RecName: Full=Glyceraldehyde-3-phosphate dehydrogenase A, chloroplastic; AltName: Full=NADP-dependent glyceralde                                            | 3.95 | 23.80 | 7 | 7 | 7 | 374  | 40.3  | 9.09  |
| 158278893 | ARF-related small GTPase [Chlamydomonas reinhardtii]                                                                                                        | 3.92 | 25.93 | 4 | 4 | 5 | 189  | 21.3  | 9.07  |
| 158275843 | mitochondrial substrate carrier protein [Chlamydomonas reinhardtii]                                                                                         | 3.90 | 10.60 | 4 | 4 | 4 | 368  | 38.4  | 9.79  |
| 158271600 | Emp24/gp25L/p24 family protein [Chlamydomonas reinhardtii]                                                                                                  | 3.89 | 9.22  | 2 | 2 | 2 | 206  | 24.3  | 9.41  |
| 158277341 | plastid ribosomal protein L9 [Chlamydomonas reinhardtii]                                                                                                    | 3.88 | 28.43 | 4 | 4 | 4 | 204  | 22.5  | 9.80  |
| 158277646 | thylakoid lumen protein [Chlamydomonas reinhardtii]                                                                                                         | 3.88 | 6.05  | 2 | 2 | 3 | 248  | 26.6  | 8.91  |

|           |                                                                                                                       |      |       |   |   |   |     |      |       |       |
|-----------|-----------------------------------------------------------------------------------------------------------------------|------|-------|---|---|---|-----|------|-------|-------|
| 158270361 | peroxiredoxin [Chlamydomonas reinhardtii]                                                                             | 3.86 | 20.00 | 3 | 3 | 3 | 3   | 185  | 20.4  | 5.86  |
| 158278637 | non-catalytic subunit of chloroplast ClpP complex [Chlamydomonas reinhardtii]                                         | 3.84 | 9.93  | 3 | 3 | 3 | 3   | 282  | 31.6  | 9.60  |
| 158279650 | E3 ubiquitin ligase [Chlamydomonas reinhardtii]                                                                       | 3.79 | 45.86 | 5 | 5 | 7 | 157 | 17.9 | 42.9  | 4.70  |
| 158275172 | predicted protein [Chlamydomonas reinhardtii]                                                                         | 3.79 | 5.71  | 2 | 2 | 2 | 420 | 42.9 | 8.24  | 8.24  |
| 11995220  | peroxiredoxin [Chlamydomonas reinhardtii]                                                                             | 3.78 | 24.12 | 3 | 3 | 4 | 199 | 22.2 | 5.68  | 5.68  |
| 158273807 | R-SNARE protein, VAMP71-family [Chlamydomonas reinhardtii]                                                            | 3.75 | 21.56 | 5 | 5 | 5 | 218 | 24.9 | 8.84  | 8.84  |
| 158274869 | small rab-related GTPase [Chlamydomonas reinhardtii]                                                                  | 3.70 | 10.89 | 2 | 2 | 2 | 2   | 175  | 20.1  | 9.48  |
| 32699336  | RecName: Full=ATP synthase subunit b, chloroplastic; AltName: Full=ATP synthase F(0) sector subunit b; AltName: Full= | 3.69 | 23.43 | 4 | 4 | 4 | 4   | 175  | 20.1  | 9.48  |
| 158283494 | succinate dehydrogenase subunit b560 [Chlamydomonas reinhardtii]                                                      | 3.69 | 10.93 | 2 | 2 | 2 | 183 | 19.5 | 9.45  | 9.45  |
| 158271558 | predicted protein [Chlamydomonas reinhardtii]                                                                         | 3.68 | 35.44 | 4 | 4 | 5 | 158 | 16.5 | 5.10  | 5.10  |
| 560221404 | ATP synthase beta-subunit, partial (chloroplast) [Chlamydomonas reinhardtii]                                          | 3.66 | 33.03 | 6 | 6 | 6 | 218 | 23.5 | 6.60  | 6.60  |
| 158275612 | NADH:ubiquinone oxidoreductase 18 kDa subunit [Chlamydomonas reinhardtii]                                             | 3.60 | 27.27 | 4 | 4 | 4 | 187 | 20.6 | 9.70  | 9.70  |
| 158278946 | ribosomal protein L14 [Chlamydomonas reinhardtii]                                                                     | 3.57 | 16.06 | 2 | 2 | 2 | 137 | 15.3 | 10.33 | 10.33 |
| 158279924 | ribosomal protein S13 [Chlamydomonas reinhardtii]                                                                     | 3.44 | 37.75 | 6 | 6 | 6 | 151 | 17.1 | 10.51 | 10.51 |
| 158283821 | plastid lipid associated protein [Chlamydomonas reinhardtii]                                                          | 3.32 | 11.45 | 3 | 3 | 3 | 227 | 23.7 | 9.29  | 9.29  |
| 158274660 | predicted protein [Chlamydomonas reinhardtii]                                                                         | 3.27 | 4.18  | 3 | 3 | 3 | 837 | 91.5 | 7.25  | 7.25  |
| 257071857 | chloroplast Fe superoxide dismutase 1 precursor [Chlamydomonas reinhardtii]                                           | 3.09 | 11.54 | 2 | 2 | 2 | 234 | 25.9 | 9.35  | 9.35  |
| 158274005 | cyclopropyl isomerase-like protein [Chlamydomonas reinhardtii]                                                        | 3.07 | 8.00  | 2 | 2 | 2 | 275 | 31.9 | 9.26  | 9.26  |
| 158272001 | high intensity light-inducible lhc-like gene [Chlamydomonas reinhardtii]                                              | 2.83 | 12.98 | 2 | 2 | 2 | 285 | 30.1 | 8.88  | 8.88  |
| 158274025 | hypothetical protein CHLEDRAFT_193064 [Chlamydomonas reinhardtii]                                                     | 2.78 | 11.89 | 2 | 2 | 2 | 227 | 24.9 | 8.88  | 8.88  |
| 158271862 | predicted protein [Chlamydomonas reinhardtii]                                                                         | 2.76 | 10.18 | 2 | 2 | 2 | 275 | 30.2 | 9.92  | 9.92  |
| 158278229 | predicted protein [Chlamydomonas reinhardtii]                                                                         | 2.66 | 21.83 | 2 | 2 | 2 | 197 | 21.4 | 9.31  | 9.31  |
| 158276432 | predicted protein [Chlamydomonas reinhardtii]                                                                         | 2.60 | 10.18 | 2 | 2 | 2 | 226 | 24.6 | 8.56  | 8.56  |
| 158276330 | ribosomal protein L24 [Chlamydomonas reinhardtii]                                                                     | 2.60 | 13.42 | 2 | 2 | 2 | 149 | 17.0 | 11.00 | 11.00 |
| 158277796 | peptidyl-prolyl cis-trans isomerase, FKBP-type [Chlamydomonas reinhardtii]                                            | 2.47 | 13.10 | 4 | 4 | 4 | 252 | 27.5 | 9.06  | 9.06  |
| 158284180 | predicted protein [Chlamydomonas reinhardtii]                                                                         | 2.41 | 8.84  | 2 | 2 | 2 | 215 | 22.9 | 8.15  | 8.15  |
| 158284294 | signal peptidase, 22 kDa subunit [Chlamydomonas reinhardtii]                                                          | 2.38 | 11.31 | 2 | 2 | 2 | 168 | 19.3 | 9.54  | 9.54  |
| 158272747 | predicted protein [Chlamydomonas reinhardtii]                                                                         | 2.38 | 4.65  | 2 | 2 | 2 | 387 | 40.3 | 11.90 | 11.90 |
| 29429167  | RecName: Full=Photosystem I P700 chlorophyll a apoprotein A2; AltName: Full=PSI-B; AltName: Full=Psab                 | 2.38 | 2.99  | 2 | 2 | 2 | 735 | 82.1 | 7.03  | 7.03  |
| 158282998 | ribosomal protein S16 [Chlamydomonas reinhardtii]                                                                     | 2.33 | 17.61 | 2 | 2 | 2 | 142 | 16.0 | 10.46 | 10.46 |
| 158275510 | predicted protein [Chlamydomonas reinhardtii]                                                                         | 2.31 | 11.84 | 2 | 2 | 2 | 245 | 26.7 | 8.82  | 8.82  |
| 247309    | histone H2B [Chlamydomonas reinhardtii, CW-15, Peptide Partial, 92 aa]                                                | 2.31 | 38.04 | 3 | 3 | 3 | 92  | 10.2 | 9.82  | 9.82  |
| 158278644 | methionine synthase reductase [Chlamydomonas reinhardtii]                                                             | 2.28 | 3.50  | 2 | 2 | 3 | 628 | 68.2 | 7.96  | 7.96  |
| 158274981 | predicted protein [Chlamydomonas reinhardtii]                                                                         | 2.23 | 11.63 | 2 | 2 | 2 | 258 | 27.4 | 9.63  | 9.63  |
| 158277738 | vacuolar ATP synthase subunit E [Chlamydomonas reinhardtii]                                                           | 2.22 | 18.10 | 4 | 4 | 4 | 232 | 26.2 | 7.11  | 7.11  |
| 158283663 | ribosomal protein L26 [Chlamydomonas reinhardtii]                                                                     | 2.22 | 19.31 | 3 | 3 | 3 | 145 | 16.5 | 10.58 | 10.58 |
| 158281371 | predicted protein [Chlamydomonas reinhardtii]                                                                         | 2.16 | 13.23 | 2 | 2 | 2 | 189 | 21.0 | 9.44  | 9.44  |
| 75338601  | RecName: Full=Dynein light chain 1, axonemal; AltName: Full=Flagellar outer arm dynein light chain 1                  | 2.14 | 11.11 | 2 | 2 | 2 | 198 | 22.1 | 5.74  | 5.74  |
| 158279168 | predicted protein [Chlamydomonas reinhardtii]                                                                         | 2.12 | 8.36  | 2 | 2 | 2 | 299 | 31.0 | 4.63  | 4.63  |
| 158275741 | S-isoprenylcysteine O-methyltransferase [Chlamydomonas reinhardtii]                                                   | 2.12 | 18.39 | 3 | 3 | 3 | 223 | 24.0 | 8.69  | 8.69  |
| 158279933 | Sigma4-Adaptin [Chlamydomonas reinhardtii]                                                                            | 2.11 | 12.50 | 2 | 2 | 2 | 144 | 17.0 | 5.08  | 5.08  |
| 158279185 | anion transporter [Chlamydomonas reinhardtii]                                                                         | 2.10 | 11.90 | 3 | 3 | 4 | 336 | 34.7 | 9.29  | 9.29  |
| 158283366 | cytochrome b5 protein [Chlamydomonas reinhardtii]                                                                     | 2.08 | 16.67 | 2 | 2 | 2 | 138 | 15.4 | 5.74  | 5.74  |
| 158281659 | predicted protein [Chlamydomonas reinhardtii]                                                                         | 2.01 | 9.66  | 2 | 2 | 2 | 176 | 19.7 | 8.76  | 8.76  |
| 158279424 | eukaryotic initiation factor 4A-like protein [Chlamydomonas reinhardtii]                                              | 2.00 | 13.08 | 5 | 5 | 5 | 413 | 47.0 | 5.72  | 5.72  |
| 158271135 | predicted protein [Chlamydomonas reinhardtii]                                                                         | 1.96 | 16.25 | 3 | 3 | 3 | 240 | 25.9 | 9.38  | 9.38  |
| 158284195 | predicted protein [Chlamydomonas reinhardtii]                                                                         | 1.89 | 6.32  | 2 | 2 | 2 | 538 | 58.5 | 7.47  | 7.47  |
| 158275255 | ribosomal protein S15 [Chlamydomonas reinhardtii]                                                                     | 1.86 | 15.86 | 2 | 2 | 2 | 145 | 16.6 | 10.56 | 10.56 |
| 158274279 | mitochondrial inner membrane translocase [Chlamydomonas reinhardtii]                                                  | 1.86 | 10.00 | 3 | 3 | 3 | 250 | 27.2 | 9.20  | 9.20  |
| 3025293   | RecName: Full=Ras-related protein YPTC6                                                                               | 1.83 | 16.67 | 3 | 3 | 3 | 216 | 24.2 | 5.91  | 5.91  |

|           |                                                                                                                      |      |       |   |   |   |   |     |       |       |
|-----------|----------------------------------------------------------------------------------------------------------------------|------|-------|---|---|---|---|-----|-------|-------|
| 158277391 | predicted protein [Chlamydomonas reinhardtii]                                                                        | 1.83 | 22.11 | 4 | 4 | 4 | 4 | 190 | 21.4  | 8.94  |
| 158271074 | predicted protein [Chlamydomonas reinhardtii]                                                                        | 1.82 | 12.95 | 2 | 2 | 2 | 2 | 139 | 16.2  | 7.74  |
| 17432909  | RecName: Full=ATP synthase subunit a, chloroplastic; AltName: Full=ATP synthase FO sector subunit a; AltName: Full=F | 1.82 | 11.76 | 2 | 2 | 3 | 3 | 238 | 26.2  | 4.70  |
| 158281688 | ribosomal protein S19 [Chlamydomonas reinhardtii]                                                                    | 1.81 | 20.67 | 3 | 3 | 3 | 3 | 150 | 17.0  | 9.96  |
| 158275624 | component of TRAPP complex [Chlamydomonas reinhardtii]                                                               | 1.81 | 14.05 | 2 | 2 | 2 | 2 | 185 | 21.2  | 4.70  |
| 158276480 | clathrin assembly factor-like protein [Chlamydomonas reinhardtii]                                                    | 1.81 | 5.78  | 3 | 3 | 3 | 3 | 571 | 60.6  | 6.87  |
| 109692744 | putative sphingomyelinase [Chlamydomonas reinhardtii]                                                                | 1.80 | 6.42  | 2 | 2 | 3 | 3 | 530 | 55.4  | 7.23  |
| 158272501 | acetolactate synthase, small subunit [Chlamydomonas reinhardtii]                                                     | 1.80 | 8.59  | 3 | 3 | 3 | 3 | 489 | 52.4  | 8.69  |
| 158277499 | predicted protein [Chlamydomonas reinhardtii]                                                                        | 1.79 | 8.02  | 2 | 2 | 2 | 2 | 262 | 28.8  | 8.88  |
| 158278226 | predicted protein [Chlamydomonas reinhardtii]                                                                        | 1.78 | 6.61  | 2 | 2 | 2 | 2 | 333 | 36.0  | 7.85  |
| 158278438 | ARF-like GTPase [Chlamydomonas reinhardtii]                                                                          | 1.76 | 22.70 | 2 | 2 | 3 | 4 | 185 | 20.6  | 5.72  |
| 158277688 | ARF-like small GTPase [Chlamydomonas reinhardtii]                                                                    | 1.76 | 18.23 | 1 | 2 | 2 | 2 | 181 | 20.5  | 5.43  |
| 14917039  | RecName: Full=30S ribosomal protein S7, chloroplastic                                                                | 1.73 | 15.48 | 2 | 2 | 2 | 2 | 168 | 19.1  | 10.43 |
| 158281517 | glutathione S-transferase-related protein, partial [Chlamydomonas reinhardtii]                                       | 1.72 | 20.00 | 2 | 2 | 2 | 2 | 150 | 16.5  | 10.07 |
| 213517417 | ribosomal protein S2 [Chlamydomonas reinhardtii]                                                                     | 1.70 | 2.20  | 2 | 2 | 2 | 2 | 910 | 102.5 | 10.71 |
| 32699675  | RecName: Full=DNA-directed RNA polymerase subunit alpha; Short=PEP; AltName: Full=Plastid-encoded RNA polymeras      | 1.70 | 8.73  | 4 | 4 | 5 | 5 | 550 | 62.3  | 9.44  |
| 158272203 | plastid ribosomal protein S13 [Chlamydomonas reinhardtii]                                                            | 1.69 | 12.80 | 2 | 2 | 2 | 2 | 164 | 18.5  | 10.73 |
| 158269913 | histone H2A [Chlamydomonas reinhardtii]                                                                              | 1.69 | 13.33 | 2 | 2 | 2 | 2 | 120 | 12.7  | 10.04 |
| 158278553 | metacaspase type II [Chlamydomonas reinhardtii]                                                                      | 1.69 | 10.51 | 2 | 2 | 2 | 2 | 409 | 42.4  | 5.31  |
| 158276757 | pre-apolferitin [Chlamydomonas reinhardtii]                                                                          | 1.69 | 8.84  | 2 | 2 | 2 | 2 | 249 | 27.3  | 5.48  |
| 158279994 | predicted protein [Chlamydomonas reinhardtii]                                                                        | 1.67 | 11.58 | 3 | 3 | 3 | 3 | 259 | 27.9  | 9.32  |
| 1710480   | RecName: Full=60S ribosomal protein L11                                                                              | 1.66 | 16.47 | 3 | 3 | 3 | 3 | 170 | 19.5  | 9.95  |
| 158272225 | NADH:ubiquinone oxidoreductase subunit 10 [Chlamydomonas reinhardtii]                                                | 1.66 | 13.41 | 2 | 2 | 2 | 2 | 164 | 18.1  | 9.31  |
| 158271298 | L-ascorbate peroxidase [Chlamydomonas reinhardtii]                                                                   | 1.65 | 11.24 | 3 | 3 | 3 | 3 | 347 | 36.5  | 9.20  |
| 158281258 | tetrapyrrole-binding protein [Chlamydomonas reinhardtii]                                                             | 1.63 | 13.85 | 3 | 3 | 3 | 3 | 260 | 29.0  | 9.64  |
| 158276831 | phytol kinase-related protein [Chlamydomonas reinhardtii]                                                            | 1.61 | 10.86 | 2 | 2 | 2 | 2 | 304 | 31.3  | 8.90  |
| 158272162 | predicted protein [Chlamydomonas reinhardtii]                                                                        | 1.61 | 9.36  | 2 | 2 | 2 | 2 | 235 | 25.2  | 9.04  |
| 158272302 | predicted protein [Chlamydomonas reinhardtii]                                                                        | 1.60 | 5.14  | 2 | 2 | 2 | 2 | 370 | 40.5  | 7.81  |
| 10720232  | RecName: Full=Protochlorophyllide reductase, chloroplastic; Short=PCR; AltName: Full=NADPH-protochlorophyllide oxid  | 0.00 | 7.05  | 2 | 2 | 2 | 2 | 397 | 41.8  | 9.42  |
| 158283853 | predicted protein [Chlamydomonas reinhardtii]                                                                        | 0.00 | 17.11 | 2 | 2 | 2 | 2 | 187 | 20.4  | 5.27  |
| 158282771 | plastid ribosomal protein L28 [Chlamydomonas reinhardtii]                                                            | 0.00 | 10.77 | 2 | 2 | 2 | 2 | 195 | 21.9  | 9.91  |
| 158282316 | aspartate kinase [Chlamydomonas reinhardtii]                                                                         | 0.00 | 2.57  | 2 | 2 | 2 | 2 | 545 | 58.4  | 7.88  |
| 158282283 | PIC1 permease [Chlamydomonas reinhardtii]                                                                            | 0.00 | 19.20 | 2 | 2 | 2 | 2 | 125 | 13.3  | 10.10 |
| 158281827 | predicted protein [Chlamydomonas reinhardtii]                                                                        | 0.00 | 7.45  | 2 | 2 | 2 | 2 | 282 | 30.4  | 8.07  |
| 158280982 | delta-cop [Chlamydomonas reinhardtii]                                                                                | 0.00 | 5.28  | 2 | 2 | 2 | 2 | 511 | 55.9  | 5.52  |
| 158280495 | predicted protein [Chlamydomonas reinhardtii]                                                                        | 0.00 | 14.57 | 2 | 2 | 2 | 2 | 151 | 16.1  | 9.36  |
| 158280394 | mitochondrial phosphate carrier 1, minor isoform [Chlamydomonas reinhardtii]                                         | 0.00 | 6.60  | 2 | 2 | 2 | 2 | 318 | 34.1  | 8.98  |
| 158279807 | predicted protein [Chlamydomonas reinhardtii]                                                                        | 0.00 | 14.98 | 2 | 2 | 2 | 2 | 207 | 23.3  | 9.82  |
| 158278628 | ribosomal protein S26 [Chlamydomonas reinhardtii]                                                                    | 0.00 | 23.76 | 2 | 2 | 2 | 2 | 101 | 11.8  | 11.37 |
| 158278601 | predicted protein [Chlamydomonas reinhardtii]                                                                        | 0.00 | 13.18 | 2 | 2 | 2 | 2 | 220 | 22.7  | 9.45  |
| 158277870 | omega-6-FAD, chloroplast isoform [Chlamydomonas reinhardtii]                                                         | 0.00 | 5.66  | 3 | 3 | 3 | 3 | 424 | 48.3  | 8.53  |
| 158277731 | peptidyl-prolyl cis-trans isomerase, FKBP-type [Chlamydomonas reinhardtii]                                           | 0.00 | 13.94 | 2 | 2 | 2 | 2 | 208 | 21.8  | 9.11  |
| 158276417 | predicted protein [Chlamydomonas reinhardtii]                                                                        | 0.00 | 14.48 | 3 | 3 | 3 | 3 | 221 | 23.0  | 10.21 |
| 158276108 | dihydropyrimidine acetyltransferase [Chlamydomonas reinhardtii]                                                      | 0.00 | 3.82  | 2 | 2 | 2 | 2 | 628 | 64.2  | 7.56  |
| 158274601 | predicted protein [Chlamydomonas reinhardtii]                                                                        | 0.00 | 11.62 | 2 | 2 | 2 | 2 | 198 | 21.1  | 9.51  |
| 158274346 | pyrroline-5-carboxylate reductase [Chlamydomonas reinhardtii]                                                        | 0.00 | 11.23 | 2 | 2 | 2 | 2 | 276 | 28.4  | 6.80  |
| 158274278 | hypothetical protein CHLEDRAFT_192823 [Chlamydomonas reinhardtii]                                                    | 0.00 | 10.45 | 2 | 2 | 2 | 2 | 268 | 28.0  | 8.85  |
| 158274006 | VID72-domain protein [Chlamydomonas reinhardtii]                                                                     | 0.00 | 3.67  | 2 | 2 | 2 | 2 | 600 | 65.8  | 5.59  |
| 158273712 | predicted protein [Chlamydomonas reinhardtii]                                                                        | 0.00 | 12.69 | 2 | 2 | 2 | 2 | 197 | 21.6  | 10.39 |
| 158270887 | ribosomal protein S11 [Chlamydomonas reinhardtii]                                                                    | 0.00 | 14.10 | 2 | 2 | 2 | 2 | 156 | 17.8  | 10.46 |

|           |                                                                                              |       |       |    |    |    |     |      |      |       |       |
|-----------|----------------------------------------------------------------------------------------------|-------|-------|----|----|----|-----|------|------|-------|-------|
| 158270659 | dual function alcohol dehydrogenase / acetaldehyde dehydrogenase [Chlamydomonas reinhardtii] | 0.00  | 2.41  | 2  | 2  | 2  | 2   | 2    | 954  | 102.2 | 7.52  |
| 2887383   | rps18 [Chlamydomonas reinhardtii]                                                            | 0.00  | 16.00 | 2  | 2  | 2  | 2   | 2    | 125  | 14.9  | 11.82 |
| 393463    | unnamed protein product [Chlamydomonas reinhardtii]                                          | 0.00  | 7.38  | 2  | 2  | 2  | 2   | 2    | 271  | 31.3  | 11.02 |
| 15011441  | LCI5 [Chlamydomonas reinhardtii]                                                             | 0.00  | 11.84 | 2  | 2  | 2  | 2   | 2    | 321  | 32.7  | 12.13 |
| 18241     | thioredoxin Ch2 [Chlamydomonas reinhardtii]                                                  | 0.00  | 28.30 | 2  | 2  | 2  | 2   | 2    | 106  | 11.5  | 5.19  |
| 238054406 | Keratin, type II cytoskeletal 1 OS=Homo sapiens GN=KRT1 PE=1 SV=6                            | 65.15 | 45.81 | 24 | 28 | 41 | 644 | 66.0 | 8.12 |       |       |
| 269849769 | Keratin, type I cytoskeletal 10 OS=Homo sapiens GN=KRT10 PE=1 SV=6                           | 48.64 | 53.42 | 20 | 25 | 29 | 584 | 58.8 | 5.21 |       |       |
| 125116    | Keratin, type II microfilillar, component 7C OS=Ovis aries PE=1 SV=1                         | 45.02 | 22.61 | 5  | 10 | 45 | 491 | 53.6 | 5.57 |       |       |
| 48474780  | Keratin, type II cuticular Hb5 OS=Homo sapiens GN=KRT85 PE=1 SV=1                            | 44.13 | 12.82 | 2  | 6  | 40 | 507 | 55.8 | 6.55 |       |       |
| 125117    | Keratin, type II microfilillar, component 5 OS=Ovis aries PE=1 SV=1                          | 42.93 | 19.72 | 3  | 8  | 42 | 502 | 55.2 | 6.46 |       |       |
| 239938650 | Keratin, type II cytoskeletal 2 epidermal OS=Homo sapiens GN=KRT2 PE=1 SV=2                  | 37.25 | 45.54 | 18 | 23 | 25 | 639 | 65.4 | 8.00 |       |       |
| 311033397 | Keratin, type II cuticular Hb4 OS=Homo sapiens GN=KRT84 PE=2 SV=2                            | 35.71 | 5.67  | 1  | 4  | 28 | 600 | 64.8 | 7.56 |       |       |
| 239938886 | Keratin, type I cytoskeletal 9 OS=Homo sapiens GN=KRT9 PE=1 SV=3                             | 34.39 | 47.35 | 20 | 21 | 28 | 623 | 62.0 | 5.24 |       |       |
| 125090    | Keratin, type I microfilillar 48 kDa, component 8C-1 OS=Ovis aries PE=1 SV=2                 | 32.53 | 35.92 | 2  | 13 | 40 | 412 | 46.6 | 4.81 |       |       |
| 125091    | Keratin, type I microfilillar, 47.6 kDa OS=Ovis aries PE=3 SV=2                              | 27.85 | 36.39 | 3  | 12 | 32 | 404 | 46.0 | 4.93 |       |       |
| 209572740 | Keratin, type I cuticular Ha1 OS=Homo sapiens GN=KRT31 PE=2 SV=3                             | 19.95 | 20.91 | 1  | 8  | 26 | 416 | 47.2 | 4.88 |       |       |
| 125115    | Keratin, type II microfilillar (fragment) OS=Ovis aries PE=1 SV=1                            | 13.58 | 32.11 | 3  | 3  | 5  | 109 | 12.7 | 4.59 |       |       |
| 136429    | Trypsin OS=Sus scrofa PE=1 SV=1                                                              | 33.03 | 25.11 | 4  | 4  | 22 | 231 | 24.4 | 7.18 |       |       |
